# Supplementary material
Source: publisher figshare collection journal article supplement (https://gsapubs.figshare.com/ndownloader/files/22398426)
Supplement: Supplementary file 1 [file 22398426]

## Sheet: Sonoma Volcanic field
Supplemental Table 1. Geocehmical Analyses, Sonoma Volcanic Field
Volcanic Center assignments: AN, Annadel; AR, Arrowhead; CD, Calistoga Domes; CS, Cup and Saucer; MSH, Mount St. Helena; NC, not classified; SG; Sugarloaf Ridge; SL, Stags Leap; SON, Sonoma; ST, Sonoma Mountain-Taylor Mountain group; WL, Wildlake. Center assignment is queried where uncertain; alternative assignment given in parentheses.
Major elements by wavelength dispersive X-ray fluorescence spectrometry (WDXRF), in weight precent oxides. Trace elements by inductively coupled plasma-atomic emission spectrometry (ICP-AES) and inductively coupled plasma- atomic emission spectrometry (ICP-AES), reported in weight parts per million. See text for analytical details.
Northing and Easting are in Universal Transverse Mercator (UTM) projection, zone 10, North American Datum 1927 (NAD27).
Field No.	Northing	Easting	Volcanic_Center	SiO2	Al2O3	FeTO3	MgO	CaO	Na2O	K2O	Na2O + K2O	TiO2	P2O5	MnO	LOI	Ba	Ce	Co	Cr	Cs	Cu	Dy	Er	Eu	Ga	Gd	Hf	Ho	La	Li	Lu	Nb	Nd	Ni	Pb	Pr	Rb	Sb	Sc	Sm	Sn	Sr	Ta	Tb	Th	Tl	Tm	U	V
06DSN37	4.25142e+06	534710	AN	63.1813	18.4699	3.5325	2.88656	5.49051	3.68389	2.18006	5.86395	0.433993	0.0807428	0.0605571	1.33	539	31.5	13.5	30	6.6	25	3.28	2.11	1.04	18	3.88	3	0.69	20.6	10	0.3	5	17.1	25	15	4.44	82.5		11	3.6	2	416		0.61	8	0.6	0.3	3.46	56
06DSN34	4.25333e+06	534777	AN	64.3345	17.893	3.57861	2.24166	4.90551	3.86007	2.45275	6.31283	0.562927	0.110575	0.0603136	1.42	556	32.6	11.5	20	7.7	22	2.75	1.78	0.83	18	3.2	3	0.55	18.3	10	0.26	6	15.3	18	19	4.14	95.8		9	3.2	1	358	0.5	0.47	8	0.6	0.25	3.82	52
06DSN35	4.25199e+06	534952	AN	67.1356	16.758	5.16189	0.258612	2.63784	4.62398	2.59646	7.22044	0.662046	0.144823	0.0206889	3.04	594	37.4	4.6	<10	4.4	18	5.72	3.13	1.56	20	6.73	5	1.15	37.2	<10	0.42	8	32.8	<5	16	8.71	95.4		12	6.5	2	175	0.6	1.04	8.1	<0.5	0.42	3.46	58
06DSN38	4.25267e+06	534009	AN	73.9247	14.268	2.18156	0.0723739	0.899504	4.55955	3.84615	8.40571	0.175765	0.0310174	0.0413565	4.04	502	48.6	0.9	<10	10	19	5.51	3.8	0.63	20	5.3	6	1.15	23	40	0.56	7	21.3	8	21	5.68	129		<5	4.8	8	44	0.8	0.89	11.7	0.8	0.56	5.36	<5
06DSN39	4.25486e+06	533426	AN	74.037	14.007	2.2011	0.12006	1.06053	4.94247	3.42171	8.36418	0.16008	0.010005	0.04002	0.32	585	46.4	0.7	40	10.3	<5	6.65	4.58	0.64	18	6.3	6	1.43	22.1	70	0.67	7	23.1	<5	25	5.88	137		7	5.4	3	50.1	0.9	1.06	10.3	0.7	0.65	4.4	<5
06DSN36	4.25174e+06	535159	AN	74.9367	14.5823	0.729114	0.0303797	0.891139	4.81013	3.83797	8.6481	0.151899	0.0202532	0.0101266	0.53	739	47.4	<0.5	<10	8.4	7	4.76	3.09	0.67	20	4.64	5	0.97	26	20	0.47	10	21	<5	25	5.83	155		<5	4.4	4	70.7	0.8	0.79	11.4	0.8	0.46	4.77	<5
04DSN29A	4.23941e+06	551821	AR	61.4912	16.1008	7.0126	2.06549	5.11839	4.24181	2.31738	6.5592	1.2393	0.282116	0.130982	1.15	538	43.7	14.8	19	5.4	31	5.97	3.63	1.49	19	5.69	5	1.27	21.2	21	0.59	11	23.3	19	20	5.69	69.4		21	5.5	3	285.4	0.9	1.05	7.3	<0.5	0.56	3.19	133
04DSN29B	4.23941e+06	551821	AR	62.6962	16.5886	5.85898	1.90544	4.97249	4.21847	2.11942	6.33789	1.27369	0.275117	0.0917058	1.5	589.8	43.3	11	18	5.7	20	6.1	3.81	1.48	19	5.96	6	1.29	21.8	13	0.62	11	24.4	6	17	6.06	66		19	5.5	2	267.6	0.9	1.13	6.9	0.5	0.57	3.17	127
04DSN16	4.23864e+06	552603	AR	66.2182	17.2034	6.23941	0.720339	3.29449	3.10381	2.23517	5.33898	0.805085	0.105932	0.0741525	5.1	747.3	52.8	6.7	23	4.9	25	7.64	4.75	1.65	20	7.22	6	1.63	32	16	0.75	9	33.7	9	13	8.84	66.7		16	7.1	2	240	0.8	1.39	7.3	<0.5	0.74	2.88	40
04DSN13	4.23962e+06	551438	AR	71.4521	16.8348	4.73788	0.32902	1.21737	1.77671	2.89537	4.67208	0.669007	0.0438693	0.0438693	7.6	991.2	38.4	2.4	34	20.3	8	5.07	3.63	0.94	22	4.4	8	1.16	19.1	<10	0.61	14	19.5	<5	16	5.06	138.4		13	4.3	4	103.7	1.2	0.89	9.5	0.6	0.59	4.19	36
NP192	4.23812e+06	551421	AR	73.5605	14.4425	2.15279	0.167207	1.3063	4.36827	3.7308	8.09907	0.25081	0.0104504	0.0209008	3.55	649.9	44.4	1.3	<10	10	6	4.18	2.92	0.56	17	4.02	5	0.88	25.3	49	0.54	7	19	<5	24	5.38	116.5		<5	3.8	3	78.1	0.8	0.73	11.4	0.8	0.45	5.65	6
04DSN14	4.2396e+06	551479	AR	73.9508	15.9855	2.9554	0.208745	1.24149	1.50516	3.7684	5.27357	0.340585	0.0109866	0.0439464	7.7	732.7	46.3	0.7	<10	20.3	10	6.01	4.07	0.93	21	4.92	9	1.36	24	<10	0.73	12	21.7	<5	24	5.89	167.4		8	5	4	78.8	1.1	1	10.9	0.6	0.65	6.12	7
04DSN09	4.23891e+06	551097	AR	74.0215	15.8986	2.50421	0.199916	1.11532	2.883	2.79882	5.68182	0.568182	0.0105219	0.0105219	5	861.3	32.4	3.8	33	9	12	3.65	2.4	0.72	19	2.96	7	0.85	19	20	0.48	12	13.8	<5	21	4.03	101.2		8	2.9	4	99.6	1	0.62	10.6	0.7	0.41	4.6	38
04DSN29C	4.23941e+06	551821	AR	74.6798	13.6592	1.79322	0.163951	0.901732	3.89384	4.67261	8.56645	0.215186	0.0102469	0.0204939	2.75	508.4	44.3	1.6	12	14.1	6	4.81	3.34	0.36	18	4.09	5	1.09	24.8	53	0.61	8	19.8	5	33	5.66	167.7		<5	4.1	6	45.4	1	0.84	14.7	1	0.54	7.08	8
07CQ37	4.26942e+06	538831	CD	59.7989	16.988	6.15801	4.44802	5.71016	3.27749	2.17821	5.45569	1.09928	0.199499	0.142499	1.53	298	26.1	28.7	60	2.71	33	6.56	3.97	2.2	19	7.09	2.8	1.33	17.8		0.47	4.8	24.3	41	8	5.59	33.9			6.05	1	311	0.3	1.15	2.95	<0.5	0.56	1.39	157
07DSN32	4.26664e+06	540273	CD	62.746	21.0278	7.77016	0.877094	2.50759	2.44012	1.39436	3.83448	1.13572	0.0674688	0.0337344	11.2	475	40.9	18.4	160	18.3	42	6.06	4.12	1.31	23	5.37	5	1.22	18.9	30	0.53	10	21.8	85	17	4.98	75.6	2.5	24	5	4	146	0.6	0.95	7.5	<0.5	0.49	2.92	130
04CQ13	4.27068e+06	540577	CD	65.0333	16.597	5.66783	0.767754	5.32912	2.24681	3.28554	5.53235	0.745173	0.270972	0.0564525	6.8	746	46	7.7	30	0.9	13	6.11	3.75	1.05	13	6.6	6	1.24	21.3	<10	0.53	9	23	9	17	5.89	101	1	10	5.5	6	88.3		0.99	7.6	0.6	0.52	3.41	41
07DSN33	4.26663e+06	540306	CD	65.5391	19.6951	7.03238	0.667631	1.52442	2.537	1.90275	4.43975	0.901302	0.0556359	0.144653	10.4	529	51.6	19.1	70	23	31	7.76	5.3	1.41	24	7.33	6	1.59	26.1	40	0.65	12	29.1	54	18	6.54	97.5	2.6	18	6.6	4	105	0.8	1.23	9.1	0.7	0.67	3.67	89
07CQ18	4.26878e+06	539716	CD	66.295	16.3547	5.4058	1.43592	3.23081	3.81151	2.65011	6.46163	0.644051	0.0876332	0.0844657	4.91	653	42.9	7	40	6.22	16	6.73	4.28	1.48	19.9	6.39	7.3	1.34	21.3		0.58	12.2	24.5	12	18	5.99	92.3			5.8	4	174.5	0.8	1.1	7.85	<0.5	0.63	3.2	54
04CQ10	4.27068e+06	540577	CD	66.4826	17.4489	6.46052	0.750966	3.51187	0.165654	4.20762	4.37327	0.817228	0.24296	0.0773053	6.2	642	54.1	5	<10	2.7	<5	8.04	5.7	1.5	21	7.75	7	1.8	25.3	<10	0.75	13	27.9	<5	20	6.93	126	1.9	12	6.7	4	49.7	0.7	1.22	8.3	0.9	0.74	4.43	32
MRM 49-03	4.26104e+06	532265	CD	66.8258	15.3575	4.06766	2.92622	3.77711	3.3828	2.86396	6.24676	0.59147	0.15565	0.0518834	2.15	847	38.3	10.1	120	7.4	21	2.23	1.18	0.94	20	2.92	3	0.44	24.4	<10	0.17	4	19.4	62	29	5.33	91.3	0.6	9	3.7	2	735		0.42	9.6	0.8	0.16	4.67	82
07CQ15	4.26885e+06	539504	CD	68.61	15.6285	5.59476	0.306843	1.37056	5.0629	2.77181	7.83471	0.521632	0.0920528	0.0409123	2.06	1195	65.6	1.8	<10	6.72	11	8.91	5.27	2.03	22	9.41	9.3	1.7	37.2		0.69	17.3	39.8	<5	19	10	115.5			9.13	4	162.5	1.1	1.48	10.05	<0.5	0.79	4.16	7
07CQ36	4.26942e+06	538831	CD	69.1987	15.4093	4.14394	0.562758	1.82129	5.08528	3.13098	8.21626	0.480902	0.0849253	0.0818557	1.87	570	44.2	24.9	210	5.59	32	5.07	3.04	1.24	20.3	5.66	5.4	1.02	19.2		0.41	10.7	22.1	74	16	5.46	73.7			5.23	2	336	0.7	0.88	6.91	<0.5	0.45	2.71	120
NP244	4.26422e+06	546225	CD	69.5513	16.6495	3.74563	0.226384	1.81107	3.95143	3.27228	7.22371	0.771764	0.0102902	0.0205804	2.05	672.8	20.9	2.8	13	5.3	12	2.43	1.9	0.91	19	2.13	6	0.55	12.9	21	0.42	10	8.5	<5	23	2.36	107.8		12	1.9	3	130.3	0.7	0.4	9.8	0.5	0.3	3.95	44
07CQ19	4.26556e+06	538698	CD	70.7908	15.7042	3.59468	0.710453	1.64359	3.26596	3.72193	6.98789	0.381736	0.0487774	0.137849	5.48	772	54.6	3.2	20	10.8	16	7.85	4.92	1.24	21	7.47	9.1	1.57	26		0.71	13.6	29.6	7	22	7.41	127			6.95	8	109	1	1.27	10.9	0.5	0.76	4.36	22
07CQ12	4.2678e+06	536984	CD	71.0564	16.3136	2.83981	0.122582	1.13388	5.10757	2.80916	7.91673	0.572047	0.0347314	0.0102151	1.7	718	45.6	1.3	<10	3.64	7	6.89	4.1	1.63	22	6.78	9.3	1.31	22.8		0.55	17.4	27.9	<5	18	6.85	109.5			6.57	5	107	1.2	1.11	10.55	<0.5	0.62	4.37	7
07CQ26	4.27149e+06	539159	CD	71.3021	16.6399	2.05581	0.0814183	1.13986	5.06829	3.16514	8.23343	0.498687	0.0386737	0.0101773	1.35	665	60.3	3.8	10	12.1	17	8.14	5.3	1.38	21.9	7.77	9.8	1.68	25.7		0.73	15.3	30.5	<5	17	7.65	112.5			7.22	6	105.5	1.1	1.36	10.1	0.5	0.81	4.13	20
04CQ11	4.27068e+06	540577	CD	71.3291	16.9219	4.26261	0.642605	0.428403	2.38835	2.9774	5.36575	0.771126	0.235622	0.0428403	5.25	392	55.9	0.8	<10	1.1	5	7.36	5.43	1.12	21	6.6	7	1.63	26.8	<10	0.79	14	26.3	<5	15	6.85	84	0.7	12	5.8	4	43.5	0.8	1.06	8.9	0.5	0.74	4.31	25
07DSN25	4.267e+06	534405	CD	71.8373	14.9396	3.10447	0.582751	1.66349	3.29519	4.03687	7.33206	0.402628	0.0529773	0.0847637	5.06	667	48.2	2.6	<10	8.8	16	7.37	4.87	1.06	19	6.74	8	1.53	25.2	10	0.69	11	26.8	10	21	6.32	117	0.9	9	6.2	4	90	0.8	1.17	9.3	0.7	0.65	4.11	16
07CQ21	4.2651e+06	538110	CD	71.8848	15.032	3.46024	0.338837	0.954904	4.15845	3.71694	7.87539	0.349105	0.0533925	0.0513389	2.46	935	56.1	2.2	10	5.2	13	8.25	5.41	1.23	17.7	7.87	9.5	1.69	27		0.77	13.9	30.8	5	20	7.5	132.5			7.1	4	84.3	1	1.34	11.4	0.5	0.82	4.72	10
04CQ2	4.26697e+06	534533	CD	72.0495	14.6707	3.81439	0.771571	1.59748	2.24951	4.29254	6.54205	0.380352	0.119539	0.054336	7.15	804	81.2	<0.5	<10	5	<5	14.9	9.1	3.29	22	19.6	9	3.08	72.3	10	1.2	14	87.8	<5	10	22.5	128	1	10	18.4	5	24.5	0.8	2.6	10.8	0.8	1.19	5.17	<5
04CQ5	4.2731e+06	535701	CD	72.8283	14.7752	3.76192	0.398198	0.586818	4.09725	2.99696	7.09421	0.419156	0.09431	0.0419156	3.32	420	33.9	2.1	20	7.2	15	5.05	3.71	0.62	13	4.85	5	1.15	18	<10	0.51	7	17.9	11	22	4.54	79.3	0.6	6	4.1	3	64.2		0.76	6.2	<0.5	0.5	2.68	12
05CQR4	4.26885e+06	535509	CD	74.0061	15.0866	1.15189	0.214067	0.540265	5.6473	3.07849	8.72579	0.254842	0.0101937	0.0101937	1	834	54	1.6	30	2.5	<5	13	8.54	2.02	24	11.9	8	2.7	31.3	20	1.21	13	39.7	9	21	9.73	86.5	0.8	<5	10	3	50.2	0.7	1.87	8.9	<0.5	1.21	4.61	8
05CQR2	4.2683e+06	535023	CD	74.3216	13.3657	2.09599	0.405022	1.05306	4.43499	4.05022	8.48522	0.212637	0.0303767	0.0303767	0.3	574	54	1.7	10	12.2	5	6.21	4.46	0.41	17	6.02	6	1.35	27.3	70	0.65	9	23.6	10	39	6.4	155	1.1	<5	5.1	5	47	0.6	0.93	13	0.8	0.64	6.18	11
07CQ10	4.26798e+06	536857	CD	74.439	14.3601	1.77598	0.192821	0.832175	4.16087	4.09998	8.26086	0.111633	0.0172524	0.0101485	1.25	891	47.2	0.5	<10	6.23	8	6.11	3.77	0.48	19.2	5.79	7.4	1.22	27.3		0.53	9.7	25.9	<5	22	7.09	168.5			5.9	4	43.8	0.8	1	16.55	<0.5	0.59	5.81	<5
04CQ15	4.26803e+06	536818	CD	74.7557	13.9322	1.65315	0.103972	0.779788	4.15887	4.46039	8.61925	0.155958	0.0727802	0.0311915	2.46	826	64.6	0.6	<10	11.6	6	7.16	4.89	0.31	18	6.58	6	1.5	32.2	60	0.71	8	28	<5	29	7.71	150	1.1	<5	6.3	6	34.1	0.6	1.06	13.5	0.9	0.71	5.93	<5
04CQ3	4.27259e+06	535085	CD	75.0133	18.4337	0.618007	0.106553	0.0745871	1.04422	4.20884	5.25306	0.436867	0.0639318	0.01	5.28	899	48.8	2.1	<10	23.5	14	6.92	4.67	0.91	17	6.68	7	1.46	25.1	<10	0.68	10	27.2	6	16	7.01	275	0.9	8	6.3	4	147	0.6	1.03	9.1	0.8	0.64	4.06	14
04CQ14	4.26799e+06	536911	CD	75.5032	14.8086	2.06487	0.104286	0.406716	3.07644	3.86902	6.94546	0.187715	0.0625717	0.0208572	2.36	713	131	0.9	<10	4.5	8	2.72	2.17	0.19	21	1.87	5	0.62	12.5	70	0.37	9	7	<5	30	2.07	141	1.2	<5	1.7	5	23.7	0.6	0.36	15.8	0.6	0.33	5.13	<5
05CQR5	4.26917e+06	536291	CD	75.6477	14.6114	1.56477	0.124352	0.487047	3.39896	3.98964	7.3886	0.15544	0.0103627	0.0103627	1.8	725	89.4	0.7	<10	7	<5	8.18	5.14	0.55	20	8.43	6	1.65	51.1	60	0.61	8	44.3	7	25	12.3	160	1.1	<5	8.8	3	28	0.6	1.28	13.8	0.6	0.72	5.92	<5
07DSN34	4.26692e+06	540473	CD	76.0281	13.7412	1.37412	0.0501505	0.571715	3.97192	4.06219	8.0341	0.160481	0.0200602	0.0200602	1.05	868	59.7	1.1	<10	8.6	10	4.59	3.35	0.33	20	3.78	3	0.97	21.6	80	0.43	8	18.3	8	23	4.95	169	1.1	5	3.8	3	34.1	0.6	0.71	18.7	<0.5	0.45	3.49	<5
04DSN84	4.26559e+06	539861	CD	76.3563	13.9791	0.897053	0.256301	1.14267	2.33874	4.90175	7.2405	0.117471	0.0106792	0.0106792	5.45	1730.6	31.5	0.9	<10	27.8	8	3.08	2	0.22	16	2.83	4	0.67	17.1	<10	0.35	7	13.5	<5	33	3.89	243.2		<5	2.8	4	371.6	0.8	0.53	15.1	1.3	0.31	5.63	<5
05CQR3	4.26849e+06	535284	CD	76.5437	13.5621	1.90075	0.143841	0.400699	2.98983	4.27412	7.26395	0.164389	0.0102743	0.0102743	1.85	639	38.2	<0.5	<10	5.5	8	3.29	1.85	0.23	20	2.34	5	0.56	17.8	50	0.28	9	12.9	<5	25	3.74	156	1.3	<5	2.5	5	26	0.6	0.38	13.5	0.7	0.27	3.48	<5
07DSN26	4.26714e+06	533991	CD (post?)	67.0004	15.6583	4.93183	1.90669	4.21815	3.01449	2.43928	5.45377	0.649766	0.106519	0.0745633	6.3	612	41	7.9	30	8.9	23	5.83	4.08	1.03	18	5.01	6	1.19	19.5	20	0.54	9	20.9	24	16	5.08	84.2	0.9	13	4.9	3	162	0.6	0.92	7.2	<0.5	0.48	3.02	53
07DSN27	4.26729e+06	533682	CD (post?)	69.8378	16.7568	4.04324	0.659459	2.4	3.23243	2.37838	5.61081	0.594595	0.0648649	0.0324324	7.42	680	46.2	3.2	30	10.2	10	6.51	4.57	1.53	23	5.74	6	1.37	22.1	10	0.55	10	24.3	19	19	5.6	77.2	1.6	12	5.4	3	171	0.6	1.05	6.7	0.7	0.57	2.49	38
07DSN22	4.26645e+06	536591	CD (post?)	70.2628	15.8966	3.78338	0.296736	2.27851	3.77279	2.88258	6.65536	0.74184	0.0317931	0.0529886	4.64	826	50	1.9	10	10.9	13	7.68	5.55	1.52	22	6.57	7	1.6	26.7	20	0.73	12	27.5	13	19	6.33	99.3	1.1	20	5.9	4	157	0.7	1.25	8	0.7	0.68	3.24	27
NP391B	4.24015e+06	571274	CS	53.8677	15.4506	12.2867	2.78471	6.76714	4.67112	1.10789	5.77902	2.43537	0.439166	0.18964	0.25	253.1	36	22.1	<10	2	10	10.2	6.86	2.68	19	10.7	3	2.2	19.7	14	0.83	13	33	6	8	7.17	30.4		28	8.5	2	253.6	0.9	1.82	3	<0.5	0.91	0.76	231
06DSN69	4.23315e+06	563773	CS	54.9873	16.3038	10.2278	3.44304	7.51392	3.8481	1.15443	5.00253	1.98481	0.243038	0.293671	1.45	266	26	29.5	90	2.7	28	4.62	2.96	1.48	17	4.47	3	0.96	12.9	<10	0.4	7	16.5	30	21	3.77	31.1	0.6	26	4.1	2	305	0.5	0.85	3.5	<0.5	0.39	1.41	288
C8	4.22042e+06	577277	CS	55.2001	16.0465	10.8214	2.5173	6.95016	4.70364	1.08314	5.78678	2.04593	0.401163	0.230669	0.45	475.5	32.1	23.8	<10	2.2	25	6.66	4.15	1.89	18	6.76	4	1.38	14.4	<10	0.65	10	20.8	6	31	4.71	25.2		28	5.5	2	305.6	0.6	1.12	3.4	<0.5	0.61	2.64	227
NP041	4.2388e+06	569257	CS	55.87	15.3723	11.3084	2.47843	6.15091	4.86655	1.25426	6.12081	2.02689	0.491672	0.180614	0.5	304.6	39.3	19	<10	1	13	8.02	5.13	2.38	19	8.53	4	1.7	17.8	13	0.7	11	27	8	11	5.88	34.6		27	6.8	2	265.6	0.7	1.4	3.5	<0.5	0.69	1.4	147
NP494	4.24041e+06	573151	CS	56.2851	17.7008	8.66466	2.16867	7.01807	4.61847	1.04418	5.66265	2.10843	0.281124	0.110442	0.55	258.3	32.1	19.2	<10	0.9	17	6.45	3.97	1.88	19	6.51	3	1.37	14.7	<10	0.51	10	20.9	<5	16	4.7	30		28	5.3	2	268.3	0.6	1.11	3.2	<0.5	0.53	1.11	211
06DSN72	4.23305e+06	563651	CS	56.7079	16.9613	8.9813	3.11638	6.81516	3.93379	1.03198	4.96577	2.07418	0.235006	0.143047	2.08	307	26.1	23.6	110	3.4	25	4.86	3.09	1.59	18	4.59	3	1.05	14.3	<10	0.4	8	17.6	15	13	4.11	32.5	0.4	26	4.5	2	304	0.5	0.78	3.4	<0.5	0.39	1.44	257
04DSN120	4.24784e+06	567306	CS	57.4697	22.2035	7.58039	2.09805	5.45071	2.87823	0.685292	3.56352	1.37058	0.158144	0.10543	5.2	524.8	38.2	15.4	58	3.5	14	4	2.32	1.29	23	4.18	6	0.82	17.2	21	0.41	10	18.7	25	27	4.72	21.5		20	4.3	2	328.3	0.8	0.75	8	<0.5	0.36	1.96	59
05DSN11	4.24779e+06	567441	CS	57.7515	18.6957	7.84047	2.67979	8.17544	2.60651	0.628075	3.23459	1.3713	0.115147	0.136083	4.2	641.6	31.5	23.6	112	1.5	42	5.47	3.46	1.25	16	5.25	4	1.12	17.2	<10	0.47	8	18.8	27	6	4.53	27.7		28	4.4	1	332.2		0.91	2.5	<0.5	0.47	1.24	130
04DSN03	4.23509e+06	569780	CS	58.8612	16.9562	6.47494	4.00637	7.14266	3.11606	1.66932	4.78538	1.00159	0.151756	0.0910538	1.25	424.7	30.5	21.3	107	4.3	43	6.55	3.9	1.42	18	6.51	4	1.37	19.6	17	0.6	7	25.7	42	13	5.98	57.5		20	5.9	2	297.1	0.6	1.12	5.5	<0.5	0.6	2.25	111
NP549R	4.23594e+06	571775	CS	60.1183	17.5203	5.88353	2.48572	6.45485	4.11947	1.81417	5.93365	1.28295	0.23053	0.0902075	0.45	423.1	35.5	14.9	21	2.5	33	4.74	2.84	1.32	17	5.1	3	0.95	18.6	24	0.47	10	19.3	10	18	4.91	57.6		16	4.5	2	280.6	0.7	0.86	4.9	<0.5	0.39	1.64	107
05DSN50	4.24903e+06	568219	CS	60.637	16.129	6.0637	3.97101	6.4414	3.38914	2.15394	5.54308	0.939159	0.163332	0.112291	0.8	466	33.5	14.9	100	5.3	15	4.34	2.74	0.95	15	4.27	4	0.92	17.3	10	0.36	8	18.7	20	17	4.66	65.9	0.9	15	4.2	2	244	0.6	0.75	6	<0.5	0.37	2.68	95
NP555	4.23876e+06	573341	CS	61.1291	17.5941	5.9996	1.81101	5.21044	4.51234	1.97289	6.48523	1.43667	0.232699	0.101174	0.7	443.3	45.6	14	13	2	11	6.49	3.9	1.63	19	6.85	5	1.35	22.1	19	0.6	8	25.6	8	13	6.24	55.1		16	6.1	2	247.2	0.8	1.15	6.1	<0.5	0.58	2.04	102
04DSN26	4.23464e+06	568380	CS	61.609	19.2008	5.80978	1.75032	5.37748	3.18431	1.9612	5.14551	0.822437	0.189793	0.0948966	4	439.6	40.8	11.5	15	4	17	5.55	3.17	1.37	21	5.42	5	1.15	19.4	13	0.49	9	23.8	18	13	5.78	54.6		15	5.6	2	345.1	0.7	1.01	6.3	0.5	0.51	2.23	55
NP549	4.23588e+06	571626	CS	61.6748	17.9293	5.54462	2.07275	5.87626	3.36822	1.94839	5.31661	1.30583	0.217639	0.0621826	2.45	504.6	47.1	12.1	22	5.4	29	7.55	5.38	1.79	17	8	4	1.69	22.7	<10	0.78	7	27.5	11	21	6.61	61.9		17	6.6	2	257.3	0.8	1.35	6.3	<0.5	0.71	2.79	115
NP516	4.23752e+06	571743	CS	62.3263	21.6047	5.57889	0.796984	3.89876	3.17717	1.33549	4.51265	1.13086	0.118471	0.0323102	6.35	396.2	61.7	9.8	14	7.7	18	7.68	4.82	1.63	21	7.56	7	1.61	25.3	17	0.75	11	27.1	10	20	6.93	43.4		15	6.4	3	239.5	0.9	1.3	9.8	<0.5	0.69	3.63	60
04J01	4.24565e+06	567643	CS	62.6471	17.2996	5.35367	0.409458	4.59617	5.2513	1.47405	6.72535	2.37486	0.542532	0.0511823	1.63	436	45.9	14.1	<10	4	5	8.55	5.37	2.84	23	9.13	6	1.77	20.6	<10	0.74	17	29.9	<5	11	6.78	42.2	0.5	16	7.6	3	251	0.9	1.31	3.9	<0.5	0.67	1.57	146
06DSN31a	4.23772e+06	564637	CS	62.6695	16.3704	5.15215	3.0933	5.88531	3.82645	2.15928	5.98574	0.642764	0.110475	0.0903887	1.76	363	37.5	14.2	60	5.3	19	6.12	3.89	1.13	18	6.05	5	1.24	19.3	20	0.58	10	21.3	39	13	5.31	67.9		16	5	2	193	0.7	1.02	6.3	<0.5	0.57	2.62	74
06DSN26WR	4.20712e+06	560160	CS	62.7464	16.447	6.3197	1.81368	3.0641	6.20705	2.36566	8.57272	0.811085	0.146446	0.0788555	11.2	451	43	10.2	<10	4.6	21	5.26	3.48	0.98	18	5.12	5	1.09	20.8	20	0.5	10	20.4	20	12	5.23	59		13	4.8	3	242	1.1	0.9	7.4	<0.5	0.51	2.95	94
04DSN101	4.2396e+06	572643	CS	62.8021	19.11	5.84478	2.33152	4.73757	2.50186	1.39466	3.89652	1.07527	0.149047	0.0532312	4.95	559.7	41.7	13.2	100	6.7	16	6.45	3.45	1.42	19	6.46	4	1.34	28.2	18	0.49	8	29.7	34	17	7.53	55.7		17	6.1	2	312.9	0.6	1.14	7.4	0.5	0.54	2.86	54
NP325R	4.22192e+06	576938	CS	62.8297	18.2542	5.2539	0.558486	5.80205	4.15762	1.25142	5.40904	1.57203	0.289585	0.031027	2.6	508.9	34.9	8.8	10	9.9	17	13.9	9.45	2.57	18	12.7	4	3.1	15.9	<10	1.3	11	26	<5	9	5.23	49.4		27	8.8	2	313.8	0.8	2.32	4.6	<0.5	1.28	3.35	176
04DSN62	4.23942e+06	570122	CS	62.8704	17.5593	8.10754	0.730313	3.14352	3.895	2.15919	6.05419	1.09018	0.254022	0.190516	4.2	556.3	51.8	12.1	12	4.9	29	8.75	5.41	2.04	22	8.08	7	1.92	25.1	13	0.79	12	30.9	<5	24	7.39	58		16	7.2	3	222.4	1	1.51	6.7	0.6	0.79	3.12	45
04DSN125	4.24315e+06	566881	CS	62.9719	16.7736	7.66642	1.08318	3.75434	4.03828	2.15585	6.19413	1.17783	0.273425	0.105164	3.75	459.1	44.3	10.4	18	9	18	7.77	4.8	1.76	22	7.02	6	1.69	19.7	20	0.77	12	26.4	<5	19	6.22	64.9		16	6.3	3	213.5	0.9	1.3	6.1	0.5	0.73	2.81	56
06DSN31b	4.23772e+06	564637	CS	63.0885	17.6815	5.49278	2.46914	5.33584	3.29567	1.75769	5.05336	0.711446	0.094162	0.0732371	5.46	409	42.8	15.5	70	6.2	37	5.37	3.42	1.15	20	5.5	5	1.08	20.2	20	0.48	10	21.7	25	16	5.38	62		19	4.7	3	211	0.8	0.92	6.7	<0.5	0.46	2.72	69
06DSN26	4.20712e+06	560160	CS	63.149	16.7408	5.31892	1.82242	4.39712	5.12821	2.26743	7.39563	0.900615	0.190718	0.0847637	3.98	555	44.2	10.7	20	5.4	14	5.3	3.62	1.05	21	5.18	5	1.09	21.8	20	0.5	10	20.5	6	15	5.27	76.7		13	4.6	3	322	0.8	0.87	8.2	<0.5	0.49	3.44	99
04DSN91	4.23759e+06	571600	CS	63.7624	17.6255	7.19085	1.08125	3.89461	3.01281	1.97355	4.98636	1.20722	0.178459	0.0734831	4.45	562.7	51.5	14.2	33	8.3	16	11.5	6.96	2.1	20	11.6	5	2.47	48.1	12	0.91	10	54.5	12	11	14.3	82.3		17	11.3	3	228.5	0.8	2.13	6.7	0.5	0.96	2.46	84
NP695	4.24909e+06	567145	CS	64.0266	17.9815	3.91851	1.5383	4.68766	4.06403	2.401	6.46502	1.09136	0.249454	0.0415757	1.93	698	44	11.2	100	3.9	12	5.31	3.09	1.22	20	5.66	4	1.03	26.1	20	0.42	9	25.4	16	24	6.56	87.4		17	5.5	<1	286	0.7	0.89	8.1	<0.5	0.41	2.69	20
NP390	4.24026e+06	571456	CS	64.1231	16.8767	4.70433	1.4428	4.15566	4.33855	3.10912	7.44767	0.934769	0.243853	0.0711238	1.6	767.8	58.1	8.8	<10	6.8	12	7.71	5.03	1.72	20	8.15	8	1.66	29.6	11	0.74	16	31.4	<5	22	8.02	95.8		12	7.2	4	243.1	1.1	1.36	10.1	0.6	0.68	4.37	62
NP524	4.23404e+06	573480	CS	64.7739	17.1578	4.40966	0.818498	4.53243	4.31758	2.57827	6.89585	1.1459	0.235318	0.0306937	1.05	625.3	43.4	7	22	4.4	18	5.09	3.17	1.25	18	5.87	3	1.04	23.7	30	0.46	9	24.5	17	24	6.2	90.9		14	5.5	2	257.2	0.8	0.95	7.4	0.5	0.4	2.28	45
04DSN95	4.23688e+06	571985	CS	64.8608	17.3613	4.31998	0.752186	4.4318	4.19801	2.67331	6.87132	1.13844	0.233787	0.030494	1.1	632.6	43.8	6.2	10	4.5	14	5.4	3.24	1.16	19	5.49	5	1.13	23.5	29	0.47	11	25	7	47	6.32	88.3		14	5.4	3	239.8	0.8	1	8.4	0.5	0.45	3.13	43
NP394	4.24251e+06	570493	CS	65.5498	16.8756	4.7482	0.236382	3.1038	5.84789	2.08633	7.93422	1.06886	0.308325	0.174717	1.05	492.2	49.1	4	<10	1.8	9	7.33	4.4	2.74	24	8.41	3	1.5	24.1	23	0.63	15	31.6	9	15	7.35	65.8		21	7.6	3	214.5	0.9	1.32	4.2	<0.5	0.58	1.32	8
04DSN45	4.24703e+06	565699	CS	67.6502	17.5971	5.59329	0.806623	2.40926	2.31373	2.62152	4.93526	0.82785	0.0530673	0.127362	5.85	663.9	62.2	11.7	14	8.8	28	7.11	4.12	1.2	20	6.98	7	1.53	25.7	32	0.61	11	30.4	13	23	7.41	102.5		14	6.9	6	170.5	0.9	1.28	11.1	1	0.61	5.14	27
04DSN117	4.24782e+06	567561	CS	67.955	16.0998	5.13296	0.185529	1.77283	5.26695	3.01999	8.28695	0.484436	0.0309214	0.0515358	1.95	744.2	57	1.2	<10	4.1	12	7.93	5.09	1.86	25	7.01	12	1.68	26.8	20	0.84	21	30.7	<5	27	7.5	75.9		14	6.9	6	118.1	1.7	1.39	10.7	<0.5	0.83	4.01	<5
05DSN12	4.2476e+06	567185	CS	68.4593	16.5243	3.98608	0.453443	2.64684	3.14247	3.96499	7.10746	0.685437	0.0738163	0.0632711	4.25	789.7	56.7	6.1	<10	9.2	22	7.25	4.59	1.05	18	7.49	7	1.53	27.2	16	0.72	13	29.6	8	21	7.56	112.5		13	7.1	3	204.3	0.8	1.25	11.4	0.8	0.67	6.05	29
07DSN15	4.21007e+06	564146	CS	69.2124	15.1877	5.18551	0.976351	1.73573	3.10263	3.9054	7.00803	0.488175	0.108483	0.0976351	7.34	423	57.8	3.4	<10	8.3	12	8.5	6.25	1.26	24	7.35	9	1.75	26.7	20	0.79	20	28.4	10	16	6.93	93.4	1.1	7	6.3	5	107	1.2	1.23	8.1	0.6	0.81	3.51	24
07KW11	4.23966e+06	537185	CS	69.3565	16.0053	5.52406	1.14483	1.40047	2.4786	3.57897	6.05757	0.400133	0.0444593	0.0666889	9.55	438	75.5	3.2	<10	7	12	12.7	8.95	2.12	23	12.8	8	2.58	35.6	<10	1.13	15	44.3	11	13	10.1	82.2	0.8	7	10.7	4	57.1	1	2.04	7.9	<0.5	1.19	3.22	27
06DSN25	4.20706e+06	560392	CS	69.4337	16.1166	4.3603	0.772712	1.71101	3.85252	3.135	6.98753	0.507782	0.0551937	0.0551937	8.25	588	69.2	7.2	10	5.4	21	9.11	5.48	1.71	18	9.5	6	1.83	31.4	20	0.76	9	37.6	<5	14	9.3	72.9		12	8.5	1	133	0.8	1.56	7.4	0.5	0.77	5.43	105
04DSN123	4.24647e+06	566228	CS	69.999	15.0878	3.99261	0.0410551	1.08796	5.26532	4.03367	9.29898	0.37976	0.0615827	0.0513189	0.6	750.4	64.2	0.9	<10	4.5	6	9.17	5.87	1.57	23	8.38	7	2.01	32.9	49	0.9	20	34.8	<5	19	9.17	136.5		10	8	6	79.3	1.4	1.63	10.5	<0.5	0.89	3.66	5
04DSN83A	4.24509e+06	569646	CS	70.1265	17.4616	3.21443	0.0829531	0.808793	4.6039	3.28702	7.89092	0.394027	0.0103691	0.0103691	2.25	593.6	73.6	0.6	<10	2.3	8	10.9	6.59	1.82	26	10.3	7	2.31	63.1	46	0.93	16	49.5	8	17	13.5	103		14	10.2	4	73.3	1.2	1.99	10.9	<0.5	0.98	3.99	6
04DSN137	4.24503e+06	569525	CS	70.2069	15.6151	3.60819	0.19366	1.30466	5.26959	3.38396	8.65355	0.377128	0.0203853	0.0203853	1.1	690.6	89.9	1	<10	2.3	9	17.9	9.31	3.39	25	18.8	5	3.42	67.5	39	1.34	15	95	<5	19	24.4	106.8		14	22.2	5	88.9	1.1	3.37	9.5	<0.5	1.39	3.9	<5
06DSN32b	4.24098e+06	564214	CS	70.327	14.8057	4.40058	0.472959	1.73761	4.83241	2.78635	7.61875	0.472959	0.0925355	0.071972	4.06	466	51.9	3.5	<10	8.6	7	8.29	5.56	1.4	22	7.77	7	1.76	26	10	0.75	12	28.4	5	17	7.04	86.8		7	6.7	3	101	0.9	1.36	8.1	<0.5	0.78	3.12	26
04DSN83	4.24509e+06	569646	CS	70.51	15.1985	3.72909	0.0604717	1.13888	5.49284	3.47712	8.96996	0.352751	0.0100786	0.0302358	0.55	679.9	71.9	0.8	<10	2.7	13	9.47	5.74	1.93	26	8.56	9	1.99	31.9	29	1	22	36.6	<5	15	9.48	111.9		13	8.6	4	96	1.5	1.65	10.6	<0.5	0.89	3.53	7
04DSN136	4.24465e+06	569290	CS	70.5487	17.5452	4.19959	0.487066	1.11484	2.38121	3.27958	5.66078	0.368005	0.0108237	0.0649421	7.5	806.8	93.9	3	14	11.7	14	16.3	10.4	2.18	26	14.1	10	3.55	48.2	27	1.66	15	55.2	11	32	13.9	86.5		7	12.8	5	65.5	1.3	2.79	11.1	1.2	1.6	5.04	16
06DSN32a	4.24098e+06	564214	CS	70.6759	14.7951	4.0447	0.351251	2.19266	4.50239	2.93773	7.44013	0.383183	0.0638638	0.0532198	6.81	563	55.5	2.7	<10	8.8	11	8.23	5.46	1.23	22	7.94	7	1.8	26.9	10	0.79	13	28.6	11	16	7.15	138		7	6.7	3	137	1.1	1.37	8.6	0.6	0.85	3.64	21
05DSN51	4249215	568190	CS	70.6867	17.1683	2.39508	0.105977	1.71683	4.04833	3.44426	7.49258	0.402713	0.0105977	0.0211954	4.43	740	35.4	1.7	40	8	5	3.93	2.61	0.69	17	4.02	5	0.83	18.3	40	0.36	7	16.4	<5	16	4.39	105		10	3.5	2	129	0.6	0.67	9.5	0.6	0.38	3.6	<5
04DSN102	4.23905e+06	572648	CS	70.9802	15.6831	2.87456	0.0711021	1.0259	5.36313	3.61605	8.97918	0.35551	0.0101574	0.0304723	0.9	698	54.4	0.5	<10	2.6	13	6.91	4.35	1.79	26	6.42	9	1.49	26.1	36	0.66	21	30.2	<5	17	8.09	116.5		12	7.2	5	82.6	1.5	1.23	11.9	<0.5	0.67	3.67	<5
04DSN52	4.24011e+06	564203	CS	71.1737	15.3156	4.00734	0.0815744	0.520037	5.19017	3.36494	8.55512	0.275314	0.0101968	0.0713776	1.5	649.5	48.9	0.7	<10	1.4	11	8.03	5.78	1.26	25	5.79	12	1.9	19.7	46	0.98	22	19.5	<5	22	4.82	94.4		<5	4.9	5	41.4	1.6	1.27	10.6	<0.5	0.91	3.08	14
04DSN124	4.24598e+06	565811	CS	71.2946	14.9359	3.79127	0.312467	1.41652	3.63504	4.11415	7.74919	0.385376	0.0208312	0.0937402	4.3	723.9	58.5	2.1	<10	9.6	10	9.05	6.1	1.35	23	7.75	9	1.93	26.9	20	0.98	17	31.2	<5	21	7.84	126.2		6	7.5	4	82	1.2	1.53	9.5	0.5	0.94	4.42	11
04DSN51	4.24029e+06	564160	CS	71.2974	14.6777	4.20237	0.0407997	0.520196	5.60996	3.27417	8.88413	0.295798	0.0101999	0.0815994	1	714.5	47.8	<0.5	<10	1.6	7	8.38	5.88	1.49	27	5.3	12	1.96	12.9	18	1.03	23	14.6	<5	16	3.4	104.4		<5	4.1	7	47.8	1.8	1.18	10.9	<0.5	0.96	2.56	5
04DSN138	4.24559e+06	569430	CS	71.4168	16.0549	2.46053	0.0717654	1.67111	4.46996	3.40373	7.87369	0.399836	0.051261	0.0102522	1.45	1117.8	61.7	0.8	19	5.9	11	9.15	5.33	1.23	20	9.49	8	1.85	33.4	36	0.79	6	39.3	<5	28	9.59	113.6		10	9	2	148.2	0.7	1.7	10.8	0.7	0.79	4.97	19
03DSN02	4.24538e+06	569908	CS	71.5807	15.4829	2.11039	0.0202922	1.13636	5.75284	3.54099	9.29383	0.36526	0.0101461	0.0101461	0.25	761.2	72.8	0.6	<10	2.5	64	9.77	6.18	1.97	26	9.09	10	2.13	37.6	38	0.93	20	41.1	<5	89	10.9	109.5		12	9.2	5	107.5	1.5	1.76	10.6	0.5	0.9	4.08	<5
NPTS	4.23989e+06	572483	CS	71.8091	16.5233	2.54046	0.153657	1.2395	3.76972	3.56484	7.33456	0.379021	0.0102438	0.0102438	2.35	744.1	38.5	3.6	<10	6.5	12	3.13	2.33	0.76	19	2.99	6	0.71	16.7	41	0.41	7	13.8	<5	31	3.85	117.7		10	2.9	3	101.8	0.8	0.52	11.5	0.8	0.36	5.68	13
03DSN01	4.24529e+06	569833	CS	71.8258	15.407	1.98735	0.0301114	1.18438	5.65091	3.54311	9.19402	0.3513	0.0100371	0.0200743	0.7	691.7	70.7	1.3	<10	3.4	244	6.83	4.42	1.63	25	6.3	11	1.44	27.3	20	0.77	21	29.2	<5	304	7.82	109.9		12	6.4	6	96.8	1.6	1.29	10	<0.5	0.65	3.51	8
04DSN05	4.23512e+06	568231	CS	71.8629	15.5989	3.31503	0.101688	0.864348	4.65731	3.21334	7.87065	0.33557	0.0101688	0.050844	1.55	629.6	41	1.2	<10	3.5	10	15.5	9.82	2.15	22	13.8	7	3.49	69.8	21	1.36	13	59.9	<5	20	15.9	107.2		9	13.1	4	70.8	1	2.67	10.9	<0.5	1.45	4.17	8
04DSN128	4.24332e+06	567208	CS	71.8835	14.7189	4.51641	0.270768	1.21304	2.76183	4.09401	6.85585	0.45489	0.0108307	0.075815	6.3	574.5	67.8	4.1	<10	10.1	6	9.78	6.25	1.23	24	7.72	9	2.09	29.2	13	1.03	12	30.7	<5	24	7.98	112		6	7.6	4	47.8	1.2	1.61	10.5	0.9	0.97	4.78	21
04DSN133	4.24379e+06	568060	CS	71.8928	14.9959	3.28036	0.0509373	1.03912	5.06316	3.32111	8.38427	0.295436	0.0203749	0.0407498	0.85	673.3	47.2	0.6	12	3.5	8	14.4	8.49	2.09	21	13.9	7	3.04	52.4	24	1.36	10	58	<5	22	14.5	110.3		9	13	3	75.6	0.9	2.53	10	0.7	1.32	4.29	<5
04DSN07	4.23523e+06	567045	CS	71.9206	15.6673	3.24478	0.294025	1.37562	2.79324	4.32637	7.1196	0.304526	0.0210018	0.0525045	5.2	652.2	64.1	2.6	22	7.6	12	9.94	6.18	1.17	22	8.55	8	2.17	35.2	21	1.05	12	35.8	<5	21	9.2	125.1		8	8.4	5	65.7	1.1	1.67	13.2	0.8	1.01	4.94	13
04DSN141	4.24559e+06	569430	CS	71.9829	15.8656	2.53849	0.135248	1.45651	3.6829	3.94299	7.62588	0.374532	0.0104037	0.0208073	3.8	784.6	48.7	1.6	<10	9.7	14	5.64	3.69	0.66	20	4.84	8	1.22	24.9	24	0.6	10	23.3	<5	28	6.4	122.3		11	5.2	4	101.5	0.8	0.99	13.3	0.9	0.55	5.45	11
04DSNSYR	4.23608e+06	565100	CS	72.1693	14.0691	3.65816	0.0922225	0.573829	5.88175	3.19705	9.0788	0.327902	0.0102469	0.0204939	0.75	674.2	41.7	<0.5	<10	3.8	<5	7.99	5.22	1.52	25	7.24	7	1.78	28.3	49	0.84	17	31.8	<5	17	8.25	106.6		<5	7.3	6	52.2	1.2	1.39	10	<0.5	0.8	3.35	<5
04DSN76	4.24445e+06	569583	CS	72.4218	14.1473	3.54188	0.0908174	0.504541	5.79213	3.19879	8.99092	0.262361	0.0100908	0.0403633	0.65	690.9	36.2	<0.5	<10	2.2	11	6.83	4.5	1.62	24	5.87	6	1.56	21.7	43	0.65	18	25.2	<5	20	6.61	100.1		<5	5.7	4	59.1	1.3	1.17	9.3	<0.5	0.68	2.18	6
04DSN129	4.24324e+06	567316	CS	72.473	14.3548	2.92031	0.0308483	0.62725	5.94345	3.3419	9.28535	0.267352	0.0102828	0.0411311	0.65	754.1	50.9	<0.5	<10	2.1	<5	8.13	5.15	1.72	26	7.07	12	1.74	24.1	48	0.83	23	28.9	<5	23	7.13	104.4		<5	6.9	5	45.1	1.7	1.39	11.1	<0.5	0.81	3.38	<5
NP362	4.24039e+06	564277	CS	72.5076	14.7118	2.59858	0.101112	0.424671	6.05662	3.31648	9.3731	0.273003	0.0101112	0.0101112	1.05	698.1	43.1	<0.5	<10	2.1	6	10.5	8.16	1.77	24	7.8	11	2.45	21	<10	1.51	16	23.5	<5	25	5.88	102.3		<5	6.2	4	48.3	1.4	1.64	9.7	<0.5	1.2	2.89	9
04DSN118	4.24782e+06	567561	CS	72.6557	14.6865	3.63656	0.399266	1.38125	2.0395	4.85594	6.89544	0.302147	0.010791	0.0431639	6.1	802.5	65.4	2.5	<10	8.4	12	7.28	4.9	0.82	20	6.77	9	1.59	31	11	0.75	11	30.7	<5	29	8.36	156.7		10	6.7	5	80.6	1	1.33	13.9	1	0.76	4.85	21
04DSN70	4.24016e+06	571319	CS	72.7061	14.1819	3.40163	0.0706571	0.605632	4.82487	3.82558	8.65045	0.353285	0.0100939	0.0201877	0.75	630.7	43.7	1.9	<10	3.9	11	8.28	4.6	1.48	22	8.4	10	1.63	32.9	15	0.7	16	43.3	<5	18	11.4	131.4		6	9.9	5	41.7	1.4	1.56	12.3	<0.5	0.69	3.57	14
04DSN64	4.24186e+06	570814	CS	72.7861	14.7392	2.47675	0.0505459	1.16256	5.20623	3.25516	8.46138	0.283057	0.0303275	0.0101092	0.7	657.7	61.6	0.7	<10	3.5	12	9.09	5.89	1.18	21	7.79	6	2	29.5	30	0.93	13	31.9	<5	22	8.2	113.8		9	7.3	4	89.2	1	1.52	9.3	0.6	0.91	3.78	<5
04DSN110	4.24414e+06	565569	CS	72.8127	14.8225	3.53905	0.120153	0.993992	2.75259	4.6095	7.3621	0.262152	0.010923	0.0764609	6.9	557.1	59.3	0.8	<10	8	8	8.87	5.88	1.19	23	7.82	9	2.03	27.2	<10	1	14	31.2	<5	23	7.89	109.3		<5	7.4	4	44.6	2.1	1.54	9.9	0.8	0.94	4.5	<5
04DSN139	4.24559e+06	569430	CS	72.8282	14.9789	1.63462	0.123368	1.64491	4.3076	4.05058	8.35818	0.370104	0.0411226	0.0205613	2.7	938.8	56.6	1.1	<10	11	14	6.88	4.27	0.91	20	6.57	9	1.47	28.9	40	0.73	11	28.8	<5	28	7.46	128.5		9	6.7	4	117.3	0.9	1.21	13.4	1	0.66	5.84	12
03DSN23	4.23628e+06	566860	CS	72.9811	14.7596	2.67164	0.0504083	1.02833	4.37544	3.85119	8.22663	0.262123	0.0100817	0.0100817	0.95	774.7	59.8	1.1	<10	4.7	10	7.82	4.94	0.98	21	6.7	8	1.7	30.9	49	0.78	12	28.3	<5	17	7.49	131.1		8	6.8	4	72.9	1	1.33	13.3	<0.5	0.78	3.6	15
05DSN10	4.24833e+06	567421	CS	73.0577	15.2339	3.14472	0.620239	1.32753	1.46899	4.87486	6.34385	0.206746	0.0108814	0.054407	7.15	733.8	53.4	7.4	<10	6.9	8	6.18	4.28	0.72	19	6.02	7	1.38	26.3	<10	0.7	8	24.8	11	23	6.69	138.1		6	5	4	74.9	0.9	1.06	13.7	0.9	0.61	4.98	15
04DSN82	4.24168e+06	564072	CS	73.0883	14.1941	3.1565	0.0509113	0.132369	5.88535	3.19723	9.08258	0.254557	0.0101823	0.040729	1.1	656.1	42	<0.5	<10	2.9	14	8.76	5.87	1.4	26	6.93	8	2.01	31.4	26	0.91	15	33.4	<5	19	8.88	104.2		<5	7.5	4	33.9	1.2	1.42	10.4	<0.5	0.95	4.03	5
03DSN05	4.24438e+06	566573	CS	73.1614	14.2337	2.90339	0.060698	0.30349	5.89783	3.16641	9.06424	0.252908	0.0101163	0.0202327	0.8	555.4	51.2	0.5	<10	3.8	24	10.4	6.57	1.33	25	9.65	10	2.35	33.6	32	0.98	15	39.1	<5	41	9.69	99.7		<5	8.9	3	26.3	1.3	1.88	9.4	<0.5	1.03	4.25	5
04DSN04	4.23515e+06	569373	CS	73.1786	15.5061	2.86912	0.161186	1.21427	2.50376	4.22308	6.72685	0.311627	0.0107458	0.0322373	5.95	735.3	65.3	3	<10	8.5	8	7.19	4.69	0.66	22	6.93	9	1.57	30	17	0.8	10	30	<5	22	7.9	126		9	6.7	4	66.5	1	1.31	13.2	0.8	0.71	4.95	13
04DSN140	4.24559e+06	569430	CS	73.3862	15.0314	1.5958	0.0514774	1.37959	3.93287	4.25203	8.18491	0.360342	0.0102955	0.0102955	3.15	856.8	52.9	0.9	36	10.5	19	6.28	3.94	0.73	19	5.77	8	1.39	27.5	30	0.68	11	26	<5	28	6.87	131.6		8	6	4	101.6	0.9	1.08	13.3	1	0.62	5.62	11
04DSN89	4.23768e+06	571469	CS	73.3927	14.5782	2.64128	0.0614251	0.859951	4.1769	4.02334	8.20025	0.255938	0.0102375	0.0102375	1.25	766.1	67.6	1.2	<10	4.3	15	8.99	5.69	0.97	21	8.11	7	1.94	45.2	51	0.89	11	39.2	<5	21	10.7	137.1		8	8	3	62.9	1	1.54	12.2	0.5	0.92	3.67	11
04DSN19	4.23539e+06	567025	CS	73.4706	14.153	2.60448	0.0605693	0.969109	4.3509	4.10862	8.45952	0.242277	0.0201898	0.0201898	0.9	814.2	50.3	1.4	<10	4.3	11	6.08	3.92	0.79	21	5.42	8	1.35	29	37	0.66	11	25.9	<5	26	7.15	140.9		7	5.6	4	60.9	1	1.03	13.6	2.5	0.61	4.42	25
04DSN82A	4.24168e+06	564072	CS	73.6274	14.2093	2.92001	0.0616903	0.164508	5.50072	3.19761	8.69834	0.257043	0.0102817	0.0616903	1.3	697.6	91	1.9	<10	4.5	13	11	7.05	1.61	25	9.79	7	2.47	44	38	1.09	14	46.5	<5	26	12.4	101.1		<5	10.1	5	30.9	1.2	1.92	10.2	<0.5	1.06	3.65	<5
03DSN03	4.24639e+06	569808	CS	74.1647	14.3853	2.82086	0.3435	1.28032	2.90413	3.9034	6.80754	0.166545	0.0104091	0.0312272	4.05	837.8	50	5.4	81	11.7	105	4.91	3.17	0.58	18	5.03	4	1.09	25	29	0.58	8	24.1	52	184	6.41	128.6		7	5	3	118.1	0.7	0.9	10.6	0.8	0.47	4.49	14
04DSN94	4.23719e+06	571809	CS	74.8643	13.0653	2.56281	0.0100503	0.532663	4.55276	4.21105	8.76382	0.190955	0.0100503	0.0201005	0.5	846.8	63.3	<0.5	<10	4.5	6	8.48	5.3	1.06	20	7.81	6	1.84	31.7	31	0.84	15	33.8	<5	28	8.86	140.2		8	7.8	5	43	1.2	1.49	10.4	<0.5	0.82	3.02	<5
04DSN96	4.23896e+06	563997	CS	75.1414	13.0457	3.01132	0.0404204	0.525465	3.95109	4.07235	8.02344	0.191997	0.0101051	0.0202102	1.1	775.9	73.3	0.6	10	4.5	10	9.22	5.64	1.13	20	8.17	8	1.97	36.4	47	0.89	15	37.4	<5	30	9.44	141.1		7	8.6	6	41.1	1.3	1.59	12.4	0.7	0.89	4.22	<5
05DSN56	4247827	562112	CS?	71.3403	15.3387	1.97653	0.267655	2.10006	5.05456	3.48981	8.54437	0.360305	0.0514721	0.0205888	1.6	791	50.8	1.1	<10	9.9	13	6.27	4.06	0.95	19	5.93	7	1.37	27	40	0.58	10	27	5	24	6.83	114	1.6	7	5.9	4	135	0.7	1.02	10.4	0.8	0.58	4.83	12
06DSN41	4.25529e+06	564441	CS?	71.6804	15.383	4.0594	0.512766	1.44215	3.67482	2.71339	6.38821	0.437987	0.0320479	0.0640957	7.05	574	48.3	3	<10	6.6	6	7.43	5.18	1.18	23	6.93	7	1.65	24.5	10	0.78	10	25.7	6	19	6.55	94.2		7	6.1	3	85.4	1.3	1.22	8.4	0.7	0.74	3.78	23
05DSN18	4.24758e+06	562244	CS?	72.8768	17.6263	2.2754	0.138874	1.03621	1.84809	3.80301	5.65111	0.373892	0.0106826	0.0106826	6.1	649.6	42	1.1	<10	10.1	7	5.19	3.86	0.5	19	5.08	7	1.19	20.9	10	0.6	11	20.5	<5	22	5.42	119		11	4.5	3	63.4	0.8	0.89	13.8	1.1	0.55	4.94	13
MRM 25-97	4.26741e+06	526096	MSH	51.6486	18.4683	9.17154	6.2187	9.43239	2.83806	0.500835	3.3389	1.41903	0.166945	0.135643	1.9	147	17.5	27.1	220	0.5	35	4.41	2.82	1.18	15	3.98	2	0.92	8.9	10	0.38	5	13.5	90	8	3.02	10.4	0.2	26	3.5	1	228		0.7	1.8	<0.5	0.41	0.52	159
03DSN06	4.2782e+06	535417	MSH	54.2574	18.5468	7.84394	3.93229	9.40241	3.23047	1.00114	4.2316	1.38301	0.278666	0.123852	1.55	313.6	27	21.8	147	2	20	4.44	2.53	1.39	19	4.25	3	0.94	13.2	11	0.49	6	16.5	55	8	3.92	28.6		26	4.1	1	337.1		0.79	3.7	<0.5	0.37	1.34	168
04MW10	4.27076e+06	527150	MSH	55.4984	16.2384	7.17369	7.5334	7.93422	3.29907	0.945529	4.2446	1.01747	0.226105	0.133607	1.71	295	20.9	32.5	340	0.5	30	3.61	2.45	1.06	16	3.72	2	0.74	10.2	20	0.3	4	13	150	11	2.96	21.2	0.1	21	3.4	1	285		0.56	2.3	<0.5	0.31	0.99	159
04MWS06	4.26907e+06	530700	MSH	56.9272	16.3232	8.34524	3.24424	7.23322	3.72373	1.32626	5.04999	2.23424	0.479494	0.163232	1.55	438	37.6	22.9	20	2.7	25	7.22	4.71	1.71	20	7.33	4	1.56	16.5	<10	0.61	9	22.7	5	10	5.14	45.2	0.4	28	5.8	2	269		1.11	3.6	<0.5	0.61	1.46	244
04DR08	4.27764e+06	534191	MSH	58.0725	16.8343	18.9809	1.15241	0.0225963	0.067789	2.88103	2.94882	1.15241	0.824766	0.0112982	7.8	317	49.9	<0.5	<10	4.3	23	6.37	4.95	1.1	25	5.19	7	1.44	22.8	<10	0.77	12	21.5	<5	15	6.01	103	4.1	22	4.7	5	20.9	0.6	0.83	8.7	0.9	0.71	3.38	75
04MWS21	4.2744e+06	530633	MSH	59.6556	17.3227	7.17507	2.41902	6.15006	4.15129	1.48626	5.63755	1.29151	0.246002	0.102501	1.73	325	28.2	14.8	20	1.8	23	6.29	3.81	1.65	17	6.83	3	1.27	19.7	20	0.48	6	24.3	<5	11	5.55	46.7	0.2	21	5.8	2	274		0.99	4.2	<0.5	0.49	1.72	111
04DR11	4.27767e+06	534295	MSH	63.5647	14.4804	9.71039	2.31048	1.37351	1.66099	4.34412	6.00511	1.70358	0.713373	0.138416	3.3	846	39.2	15.4	50	2.4	27	6.21	3.21	1.21	18	6.93	4	1.24	17.2	80	0.36	7	22.9	51	13	5.18	135	5.2	26	5.8	2	158	0.5	1	4.6	1.9	0.46	1.91	142
04DR12	4.27759e+06	533695	MSH	63.8046	15.8167	6.57413	2.41016	5.49817	2.08737	2.44244	4.5298	0.968367	0.268991	0.129116	6.4	594	49.6	11.2	40	2.5	12	6.81	4.05	1.49	21	6.92	6	1.4	22.4	40	0.47	10	26.4	23	14	6.32	86.9	1	18	6.3	3	115	0.7	1.15	7.6	0.6	0.57	3.08	77
04DR04	4.27879e+06	534640	MSH	67.2118	16.0331	7.67679	1.11489	1.07241	3.29157	2.11298	5.40455	1.01933	0.350393	0.116798	4.98	819	49.9	8.3	50	2.7	16	11.3	7.05	2.03	19	11.8	5	2.38	36.3	60	0.81	10	37	21	15	9.04	64	1.1	19	8.8	3	112	0.5	1.79	7	<0.5	0.88	2.68	71
04MW09	4.27076e+06	527150	MSH	68.9847	17.8313	5.0039	0.802407	1.79427	2.29578	2.54096	4.83673	0.601805	0.100301	0.0445782	9.24	659	57.6	5.5	20	8	16	7.32	5.05	1.06	19	7.16	7	1.59	24.8	<10	0.74	11	27.4	15	20	6.98	93	0.8	12	6.6	4	147	0.7	1.12	9.1	0.8	0.69	4.12	24
04DR03	4.27862e+06	534733	MSH	70.632	18.6936	2.80404	0.223048	0.350505	3.31386	3.27138	6.58524	0.562932	0.106214	0.0424854	4.74	849	60.3	0.8	<10	2.2	12	9.67	6.5	1.7	22	8.43	7	2.12	29.5	30	0.9	13	31	7	17	7.75	87	1.5	25	7.1	3	85.3	0.7	1.34	9.5	0.5	0.89	4.03	<5
04DR06	4.27821e+06	533937	MSH	71.5421	15.5803	4.41971	1.01749	0.349761	2.81929	3.79438	6.61367	0.349761	0.0741918	0.0529941	4.09	866	37.1	4.7	80	5.4	10	8.18	6.3	0.66	23	5.46	8	1.98	13.4	110	0.93	13	15.1	62	18	3.74	129	1.4	5	3.7	4	57.3	0.8	1.05	8.7	0.8	0.93	3.75	18
04DR07	4.27773e+06	534469	MSH	71.6541	16.3089	3.84049	0.305135	0.326179	3.73527	3.40909	7.14436	0.315657	0.0841751	0.0210438	3.42	939	54.1	1.3	10	1.8	8	14.2	8.46	3.06	24	16.4	8	2.81	67	20	1.1	14	72.6	7	18	18.9	115	1.3	<5	16.2	4	49.4	0.8	2.35	8.8	0.6	1.14	4.02	13
07DSN28	4.26331e+06	529986	MSH	71.7272	15.6535	3.49523	0.300204	1.59751	3.45234	3.32368	6.77603	0.385976	0.0321647	0.0321647	5.72	742	67.1	3.3	<10	7.6	13	7.4	5.33	0.97	21	6.76	7	1.5	31.1	10	0.73	14	32.1	26	18	7.83	107	1.3	10	6.9	5	97.9	0.9	1.2	10.2	0.6	0.68	3.56	17
04MWS15	4.2743e+06	531600	MSH	72.2378	15.0308	4.55412	0.841279	1.55917	1.76108	3.46607	5.22715	0.403814	0.100953	0.0448682	9.76	640	46.4	4.4	20	9.1	10	6.49	4.49	0.83	17	5.97	7	1.41	22.2	10	0.63	10	23	15	18	5.88	138	0.7	8	5.3	4	84.3	0.6	0.94	8.4	0.9	0.6	4.07	17
04DR05	4.27791e+06	533746	MSH	72.5344	11.5839	3.18285	0.68204	5.8244	3.59424	1.99199	5.58623	0.400563	0.119086	0.0866082	5.82	657	48.5	3.9	30	8.4	12	7.57	4.9	1.94	14	8.82	5	1.56	24.2	70	0.69	9	31.3	88	11	7.52	55.3	2	6	7.7	2	108		1.24	6.2	<0.5	0.67	2.76	22
07DSN24	4.27125e+06	527723	MSH	72.9596	14.4652	4.08616	0.253405	0.876359	3.49488	3.54767	7.04255	0.274522	0.0105585	0.0316756	5.75	756	60.1	0.8	<10	8.1	11	9.72	6.71	1.46	25	8.33	9	2.01	28	<10	0.89	15	32.8	8	21	7.49	108	1.2	<5	7.6	4	54.7	1	1.49	9.1	0.7	0.86	4.15	12
04MW11	4.27083e+06	527190	MSH	73.2227	15.0064	2.80971	0.127714	0.744998	3.32056	4.40613	7.72669	0.255428	0.063857	0.0425713	5.08	761	62	0.9	<10	7.7	5	9.61	6.54	1.49	24	8.72	8	2.12	28.1	<10	0.94	14	31.8	7	21	7.84	121	1.1	<5	7.7	4	49.2	0.8	1.4	10.2	0.7	0.89	4.3	11
07DSN17	4.27788e+06	536268	MSH	73.3271	14.4793	2.14086	0.31027	1.26176	3.9818	4.11625	8.09805	0.299928	0.0517117	0.031027	3.15	911	58.5	1.7	<10	11	13	7.09	5.23	0.65	19	6.5	7	1.5	27.6	30	0.7	10	28.8	11	25	6.95	139	1.8	9	6.4	5	78	0.7	1.17	11.2	0.8	0.66	4.9	17
07DSN23	4.27016e+06	530896	MSH	73.6745	15.2076	1.84957	0.143855	0.637074	5.52815	2.66132	8.18948	0.26716	0.0102754	0.0205508	3.13	956	42.5	<0.5	<10	18.3	8	5.54	4.1	1.13	26	4.34	9	1.21	20.3	20	0.59	15	20.4	11	21	5.04	107	0.7	<5	4.3	4	58	0.9	0.83	9.9	<0.5	0.54	3.42	6
04MW12	4.27083e+06	527190	MSH	73.6865	14.0252	3.97022	0.194196	0.712051	2.57849	4.49887	7.07735	0.226562	0.0647319	0.0431546	6.16	686	61.6	1.1	<10	7.8	9	10.5	7.18	1.35	22	9.28	8	2.2	29	<10	1.03	14	33.5	6	46	8.12	121	1	<5	7.8	5	38.6	0.8	1.44	9.2	0.6	0.98	4.22	11
04MWS20	4.27434e+06	531636	MSH	73.7384	15.448	1.05046	0.123584	1.23584	4.32544	3.64573	7.97116	0.350154	0.0720906	0.0102987	1.84	793	35.3	0.9	10	5.6	8	4.14	3.29	0.61	18	3.64	8	0.96	18.5	30	0.54	9	15.1	<5	23	4.14	114	1.3	9	3.3	4	81.2	0.5	0.62	10	<0.5	0.5	4.29	19
MRM 70-02	4.28098e+06	500122	MSH	73.779	16.1424	0.972682	0.248344	1.1072	3.87003	3.54925	7.41929	0.31043	0.0103477	0.0103477	1.95	731	45.7	1.2	<10	4.6	6	4.8	3.24	0.68	18	4.31	6	1.06	26.4	40	0.53	9	23.2	5	17	6.2	118	1	7	4.7	3	52.8	0.7	0.8	10.6	<0.5	0.49	4.69	11
04MWS3	4.27122e+06	527748	MSH	74.1295	13.8859	3.37535	0.128178	0.715659	2.90536	4.55031	7.45567	0.202948	0.0640889	0.0427259	5.29	687	65.2	<0.5	<10	7.6	<5	9.83	6.99	1.23	22	9.42	8	2.18	29.9	<10	0.96	14	32.8	8	18	8.35	119	0.9	<5	7.8	4	37.1	0.8	1.4	9	<0.5	0.95	4.08	9
04MSH7	4.27853e+06	529523	MSH	74.206	14.149	1.9544	0.0916124	0.783795	4.93689	3.44055	8.37744	0.223941	0.0101792	0.203583	0.75	913	86.3	<0.5	<10	2.7	15	9.71	6.15	1.48	22	8.83	8	1.95	31.3	50	0.82	14	35.7	<5	22	9.14	118	1.3	<5	9	5	59.4	0.8	1.47	11	2.8	0.88	4.26	<5
04MWS1	4.27014e+06	530684	MSH	74.4086	14.3011	3.04301	0.107527	0.731183	2.86022	4.22581	7.08602	0.215054	0.0645161	0.0430108	5.91	658	65.5	1.8	<10	8.2	6	10.3	7.26	1.31	23	9.26	9	2.29	30.6	<10	1.04	14	34.4	7	20	8.61	124	1	<5	7.9	5	36.1	0.9	1.55	9.9	0.6	0.99	4.22	<5
04MSH8	4.27979e+06	528735	MSH	74.4396	13.7295	2.93897	0.150166	1.25496	1.83417	5.36308	7.19725	0.225249	0.0107262	0.0536308	6.05	748	72.9	<0.5	<10	10.5	<5	10.7	7.57	1.43	22	10	8	2.34	34	<10	1	15	36.8	<5	21	9.39	141	1.4	<5	8.8	5	56.5	0.8	1.54	10.2	1	1.07	4.34	<5
07DSN16	4.27784e+06	536185	MSH	74.5297	14.6416	0.793086	0.142349	1.08795	4.73818	3.78241	8.52059	0.233859	0.0406711	0.0101678	0.75	909	68.9	0.6	<10	8.1	11	9.57	5.93	0.67	20	9.28	7	1.84	37.7	40	0.73	10	37.1	11	21	9.03	149	1.4	8	7.8	4	71.7	0.7	1.61	11.1	0.7	0.69	4.48	9
04MWS17	4.2743e+06	531600	MSH	75.2556	14.2127	0.828221	0.102249	0.910021	4.33538	4.12065	8.45603	0.255624	0.0715747	0.010225	0.99	828	78.2	0.6	<10	5.1	6	9.2	5.64	0.59	18	9.74	6	1.82	37.5	30	0.72	9	38.1	7	21	9.99	131	1.2	6	8.7	3	51.8	0.6	1.43	11.4	<0.5	0.78	4.7	7
04DR02	4.27939e+06	534998	MSH	77.7153	14.253	0.988348	0.104037	0.156055	3.32917	3.23554	6.56471	0.239284	0.0832293	0.0104037	2.78	1070	69.5	<0.5	<10	2.1	<5	10.3	7.4	1.27	24	9.35	8	2.25	33.5	<10	1.02	14	34.6	6	19	8.97	100	2.3	<5	8	5	14.8	0.8	1.5	9.1	<0.5	1.04	4.05	<5
MRM 6-99B	4.26993e+06	526140	MSH	79.3424	11.3346	0.673951	0.398244	0.990503	3.45144	3.53314	6.98458	0.22465	0.0408455	0.0102114	0.7	700	48	1.1	10	5	<5	6.06	3.92	0.51	14	5.51	5	1.26	25.7	50	0.58	8	25.7	8	30	6.7	115	0.9	6	5.7	3	54.9	0.7	0.98	10	0.6	0.61	4.5	13
MRM 6-99	4.26993e+06	526140	MSH	79.4312	11.3763	0.721178	0.314881	0.883697	3.44337	3.5551	6.99848	0.223464	0.0406298	0.0101574	0.7	707	47.3	0.9	10	5.6	<5	6.21	3.77	0.56	14	5.28	5	1.28	25.1	50	0.61	8	25	<5	67	6.49	121	1.4	6	5.4	4	52.8	0.7	0.99	9.3	0.6	0.6	4.36	11
05CQ10	4.27357e+06	533015	MSH ? (CD)	69.5798	15.2992	3.81431	0.639212	3.33229	3.1751	3.36372	6.53882	0.618254	0.136226	0.0419155	3.6	704	53.7	3.7	<10	11.2	7	7.24	4.83	1.19	18	7.05	7	1.53	26.2	<10	0.63	10	27.7	<5	18	6.98	120	1.3	9	6.3	4	170	0.6	1.08	9.4	0.6	0.66	4.01	35
05CQ11	4.27344e+06	532972	MSH ? (CD)	78.0578	12.5999	0.860479	0.174145	0.225364	3.76972	4.18972	7.95943	0.102438	0.0102438	0.0102438	0.9	326	47	<0.5	<10	4	<5	5.55	4.21	0.19	19	4.03	6	1.25	19.3	60	0.63	10	16.2	5	21	4.56	176	1.4	<5	3.6	7	9.7	0.7	0.71	15.6	1	0.63	5.79	5
05CQ9	4.27343e+06	533033	MSH ? (CD)	78.1644	12.2037	0.68583	0.181543	0.171457	3.99395	4.49823	8.49218	0.0806858	0.0100857	0.0100857	0.6	340	37	0.7	10	9.8	<5	4.8	3.96	0.19	17	3.98	5	1.13	19	50	0.65	10	16.2	7	19	4.49	189	1.1	<5	3.6	6	8.8	0.7	0.67	15.1	0.7	0.63	5.88	6
MRM 18-99	4.26993e+06	526140	MSH?	52.1712	15.3324	10.5989	6.47253	8.89072	3.48837	0.648282	4.13665	1.97572	0.246964	0.174933	2.1	232	22.8	34.2	220	1	32	5.72	3.55	1.48	16	5.04	3	1.19	11.8	<10	0.46	8	17.2	109	6	3.87	14.2	0.3	25	4.6	1	232		0.94	2	<0.5	0.49	0.73	238
MRM 44-99	4.2689e+06	527877	MSH?	54.5084	14.9771	11.8186	2.89353	6.5512	4.73765	1.45695	6.1946	2.20071	0.682629	0.173204	0.1	764	54.7	28.8	10	1.4	21	8.81	5.32	2.42	20	8.89	4	1.86	27.3	10	0.69	18	34.9	<5	7	8.15	40.7	0.3	24	8.3	2	240	1	1.49	4.7	<0.5	0.76	1.66	219
MRM 16-97	4.26865e+06	527007	MSH?	54.7945	18.5762	7.89747	4.55583	9.90037	2.92653	0.342466	3.26899	0.73682	0.155666	0.114155	1.9	430	16.1	20.9	90	0.7	34	5.63	3.79	1.52	14	5.34	1	1.25	16.3	10	0.5	3	18.5	<5	7	4.17	7.3	0.3	25	4.5	<1	232		0.94	1.8	<0.5	0.51	0.83	153
05CQ8	4.27318e+06	533165	MSH?	58.0947	14.7268	11.9846	1.52346	5.56571	4.33679	1.52346	5.86025	1.38127	0.619541	0.243754	0.7	436	47.1	8	<10	1.5	17	7.84	4.96	1.87	20	8.4	3	1.63	20.9	10	0.58	8	28.8	<5	10	6.58	48.4	0.5	36	7.3	2	227		1.21	5.6	<0.5	0.61	1.57	110
07DSN29	4.26349e+06	532930	MSH?	72.7352	17.0949	2.99434	0.315767	0.990854	2.86368	2.4608	5.32448	0.500871	0.0108885	0.0326655	7.8	1080	67.5	4.5	50	8.4	14	8.89	6.16	1.26	26	7.86	9	1.83	33.8	30	0.79	18	33.9	25	23	8.57	90.1	1.4	8	7.2	5	116	1.2	1.41	10.2	0.6	0.82	5.2	36
04CQ4	4.27265e+06	533177	MSH?	72.76	15.2706	3.43589	0.707389	1.60566	1.41478	4.3117	5.72648	0.359308	0.101056	0.0336852	10.1	590	52.3	1.3	<10	1.6	<5	9.18	6.17	1.5	19	9.63	7	1.95	33.1	<10	0.84	14	36.9	<5	22	9.41	96.4	0.8	7	8.5	5	80	0.8	1.4	9.8	0.6	0.86	4.57	7
MRM2-01	4.28436e+06	527545	MSH?	74.7044	13.7587	2.09947	0.285365	0.743987	4.09702	4.02568	8.12271	0.25479	0.0203832	0.0101916	0.9	794	82.7	2.4	20	9.2	11	14.9	7.87	1.33	18	15.9	7	2.77	71.6	20	1.04	10	86.7	39	25	22.5	138	1.6	7	20.1	5	44.7	0.8	2.81	13	0.9	1.11	5.7	10
995-25D	4.26162e+06	523290	NC	50.2476	17.4371	10.8337	5.974	10.3178	3.37392	0.27858	3.6525	1.23813	0.144449	0.154767	1.7	57.5	12.9	31.6	90	1	79	4.11	2.64	1.11	14	3.49	2	0.89	5.3	<10	0.33	4	10.8	45	17	2.17	6	1.8	25	3.1	3	227		0.66	1.3	<0.5	0.35	0.36	170
MRM38-99B	4.26665e+06	524399	NC	50.8404	20.9834	7.01535	4.18624	11.6922	3.25712	0.511536	3.76866	1.14835	0.260988	0.104395	1.3	254	35.9	19.8	90	0.3	23	3.37	1.96	1.34	15	3.75	2	0.69	17.9	<10	0.25	11	18.6	27	<5	4.53	5.7	0.2	21	4.1	<1	364	0.7	0.62	3.7	<0.5	0.26	0.42	98
MRM 11-99	4.28614e+06	508884	NC	51.5421	16.1004	9.70204	8.7402	8.4161	3.00052	0.909566	3.91009	1.24412	0.198641	0.146367	1.95	283	32	39.4	330	0.3	32	5.36	3.23	2.01	17	6.54	2	1.05	20.8	10	0.36	6	27.2	186	6	6.37	21.1	0.1	24	6.3	2	330		0.88	2.3	<0.5	0.42	0.65	207
MRM 29B99	4.26665e+06	524399	NC	51.9751	18.6071	7.45322	4.42827	12.0582	3.27443	0.592516	3.86694	1.26819	0.22869	0.114345	1	156	24.4	28.3	270	0.3	50	3.77	2.18	1.2	14	3.86	2	0.82	12.4	<10	0.3	9	15.6	106	<5	3.52	11.1	0.2	23	3.5	1	352	0.6	0.65	2.7	<0.5	0.31	0.65	158
MRM 5-01	4.27e+06	510627	NC	52.5667	18.1725	7.77207	4.68172	11.2936	3.41889	0.50308	3.92197	1.28337	0.174538	0.13347	0.9	207	19.3	28.1	140	0.6	28	4.6	2.72	1.32	15	4.3	3	0.95	10.3	<10	0.37	7	14.3	45	<5	3.12	7.8	0.2	26	3.8	2	247		0.75	2.2	<0.5	0.4	0.71	187
MRM 41-03	4260666	532385	NC	55.164	19.2052	7.79446	4.04536	8.75472	3.2179	0.704873	3.92277	0.888753	0.112371	0.112371	1.65	237	21.3	21.9	10	2.3	26	5.76	3.32	1.52	16	5.24	2	1.16	11.9	<10	0.43	4	17.3	32	12	3.8	24.7	0.3	24	4.3	<1	307		0.95	2.3	<0.5	0.48	1.15	159
HE196R	4.27822e+06	513914	NC	55.2764	18.4596	6.7993	4.90206	8.99395	3.24069	0.635832	3.87653	1.42549	0.174341	0.0922982	2.94	255	26.2	24.2	360	0.7	34	6.33	3.77	1.75	16	5.91	3	1.35	15.2	<10	0.49	6	22	119	7	4.9	11.2	0.4	26	5.8	1	274		1.06	2.3	<0.5	0.54	1.04	179
SO28	4.22175e+06	535909	NC	61.3971	18.795	6.65135	2.76705	3.39355	3.39355	1.98392	5.37747	1.40963	0.135742	0.0730918	3.72	607	122	18.6	60	2.4	23	13	7.28	4.68	22	14.4	4	2.58	70.3	20	0.91	10	74.8	21	14	18.9	65.2	0.4	18	15.8	3	233	0.7	2.4	7.8	<0.5	1.01	3.1	98
04DSN112	4.26668e+06	524545	NC	65.7426	20.5831	4.33443	0.946095	2.61826	2.34323	2.34323	4.68647	0.935093	0.0990099	0.0550055	7.45	756.9	53.9	9.2	47	6.4	21	6.77	4.3	1.26	24	6.15	9	1.48	23	48	0.65	12	26.4	31	22	6.4	70		16	6.2	4	143.3	1	1.21	11.1	0.6	0.66	3.69	49
05DSNROB	4.22806e+06	540616	NC	72.3605	15.0107	2.65021	1.31974	1.56652	3.50858	3.22961	6.7382	0.300429	0.0321888	0.0214592	5.8	738.1	50.3	3.3	<10	9.2	11	6.16	4.17	0.79	17	6.27	5	1.29	27.7	26	0.63	7	26.3	13	25	6.96	101.7		6	5.9	5	98.9	0.8	1.11	12.8	0.7	0.57	5.3	33
04DSN116	4.24693e+06	508728	NC	73.2679	14.9504	2.53263	1.90784	1.29421	2.76693	2.94544	5.71237	0.312395	0.011157	0.022314	6.8	849.9	42.3	2.5	28	8.4	11	4.9	2.93	0.58	17	4.31	6	1.1	25.7	33	0.55	7	21.6	16	23	6.22	92.5		6	4.5	4	136.8	0.8	0.81	11.6	0.7	0.48	6.27	19
MRM 16-05B	4.22017e+06	546452	NC	73.5913	14.7183	1.97645	0.178722	1.209	3.85828	4.22624	8.08452	0.210261	0.010513	0.0210261	3.9	526	43.6	0.6	<10	8.6	<5	6.17	4.32	0.68	20	5.1	6	1.36	23.1	<10	0.73	13	21.5	6	20	5.74	111	1.6	<5	4.9	6	71.8	1	1	10.7	0.8	0.69	4.52	<5
NP729	4.26309e+06	542820	Post CD flow	54.1276	18.9497	6.6324	5.85626	9.54541	3.19524	0.655176	3.85042	0.846689	0.080637	0.110876	1.45	193	13.8	28.2	190	0.4	45	3.32	2.05	1.05	17	3.38	2	0.68	7.5	20	0.28	3	10.3	70	9	2.27	15.9		27	2.6	<1	287		0.56	2.4	<0.5	0.29	0.94	110
07CQ22	4.2651e+06	538192	Post CD flow	54.8186	19.135	6.65784	5.1222	8.39555	3.4249	1.25277	4.67767	0.939574	0.132349	0.121235	0.83	617	61	1.6	<10	2.56	9	9.37	5.37	1.81	22.5	10.05	9.4	1.8	36.2		0.66	15.4	44.9	<5	14	11.25	103.5			10.15	6	86.6	1.1	1.63	10.45	0.5	0.8	4.33	18
07CQ40	4.26496e+06	541307	Post CD flow	55.3162	19.456	6.52925	5.15041	7.86755	3.52823	0.973305	4.50154	0.942889	0.124705	0.111525	1.1	980	36.1	1.2	<10	4.99	9	4.04	2.62	0.37	22	3.52	8.6	0.82	16.4		0.41	11.1	14.7	<5	26	3.83	167			3.35	7	36.4	1	0.61	18.85	0.6	0.43	6.03	7
07CQ46	4.26502e+06	540579	Post CD flow	68.9677	16.412	3.05148	0.731944	2.21645	4.24734	3.67003	7.91736	0.54638	0.105152	0.0515453	2.64	891	47.2	0.5	<10	6.23	8	6.11	3.77	0.48	19.2	5.79	7.4	1.22	27.3		0.53	9.7	25.9	<5	22	7.09	168.5			5.9	4	43.8	0.8	1	16.55	<0.5	0.59	5.81	<5
07KW5	4.25301e+06	543435	SG	49.2616	15.6787	8.09225	13.1499	9.74105	2.44791	0.525996	2.9739	0.839571	0.141614	0.121384	1.02	113	17.1	52.3	400	1.2	60	3.78	2.62	0.88	14	3.69	2	0.77	9.7	<10	0.35	8	12	412	8	2.77	14.7	0.2	21	3.3	1	267		0.63	1.3	<0.5	0.35	0.57	125
07KW2	4.25298e+06	543534	SG	52.4311	15.7393	11.8296	3.3985	7.60902	4.401	0.81203	5.21303	2.93734	0.661654	0.180451	1.13	174	34.2	30.2	<10	0.5	31	6.98	4.51	2.26	22	7.44	3	1.39	14.2	<10	0.48	11	23.1	<5	<5	4.94	17.2	0.6	28	6.1	2	240	0.7	1.15	2.6	<0.5	0.51	1.02	275
NP291	4.25599e+06	539466	SG	55.8687	17.576	7.15724	4.06684	8.70747	3.95611	1.00664	4.96275	1.3489	0.191262	0.120797	0.5	242.9	25.1	23.1	34	1.7	27	4.58	2.99	1.35	16	4.67	3	0.98	11.9	<10	0.54	7	15.3	11	11	3.44	25.1		25	3.9	1	325.9		0.79	3	<0.5	0.39	1.25	161
05DSN04	4.25646e+06	538821	SG	56.4448	17.2719	8.35305	2.9318	7.59181	4.21767	1.19329	5.41097	1.57391	0.216027	0.20574	1.8	305.6	28.1	22.7	26	2.5	23	5.08	3.37	1.47	16	5.27	4	1.11	13.6	<10	0.46	9	17.4	6	10	4.07	31.6		25	4.3	1	330.6	1.2	0.87	3.5	<0.5	0.45	1.52	176
07KW4	4.25334e+06	542214	SG	57.0887	19.17	7.88919	2.47525	7.68907	2.95976	0.969033	3.9288	1.48515	0.147462	0.126396	5.53	295	28.4	23.3	30	3.5	22	4.53	3.14	1.34	19	4.81	4	0.98	12.7	<10	0.38	8	15.8	8	9	3.65	31	0.4	22	4.1	2	282		0.75	2.9	<0.5	0.38	1.3	150
07KW3	4.25319e+06	542681	SG	57.8353	16.6989	8.81784	2.4132	6.0279	4.38856	1.34406	5.73261	2.04663	0.285103	0.142552	2	319	30.9	21.1	<10	1.8	17	5.49	3.43	1.6	20	5.79	4	1.13	15.8	20	0.38	11	20.2	<5	7	4.74	43.6	0.3	22	5.2	2	251	0.6	0.91	3.4	<0.5	0.46	1.06	185
05DSN05	4.25565e+06	539897	SG	62.4682	15.8307	6.64361	1.84149	4.24255	5.24977	2.2688	7.51857	1.04792	0.295045	0.111914	0.55	595.3	43.3	11.8	15	3.2	12	6.43	4.39	1.81	20	6.87	4	1.39	22.8	27	0.62	9	25.2	24	25	6.12	63.9		11	5.6	2	427.5	0.6	1.13	6	<0.5	0.62	2.44	67
07KW6	4.25284e+06	540407	SG	67.98	16.8419	3.06216	0.969685	3.14382	4.28703	3.00092	7.28795	0.520568	0.132694	0.0612432	1.74	609	38.3	6.1	<10	9.7	16	2.93	2	0.87	19	2.91	4	0.57	20.5	10	0.27	8	16.1	8	19	4.36	104	0.8	<5	3.1	3	261	0.6	0.5	7.9	0.6	0.27	4.2	23
05DSN01	4.25672e+06	539095	SG	69.3642	14.4407	4.81696	0.131832	1.21692	6.5612	2.99158	9.55278	0.334652	0.0304229	0.111551	0.7	577.4	76.4	1.2	<10	3.9	7	14.1	10.3	2.33	25	12.9	11	3.15	34.8	55	1.53	18	44.7	<5	19	10.7	82.5		<5	11.3	4	59.7	1.8	2.37	9.1	<0.5	1.45	3.89	<5
05DSN03	4.25632e+06	538749	SG	70.3004	13.0024	5.59277	0.162404	0.548112	6.38449	3.48153	9.86602	0.375558	0.0203004	0.131953	0.3	467.6	94.6	1.6	<10	0.9	8	19.6	13.5	2.99	30	17.7	18	4.22	48.5	62	2	39	58.9	7	23	14.6	96.7		<5	14.8	8	19.2	2.8	3.23	11	<0.5	1.91	4.6	<5
05DSN02	4.25668e+06	539029	SG	70.4719	17.575	3.28926	0.494464	0.999678	2.7518	3.86972	6.62152	0.515963	0.0107492	0.0214984	5.6	398.4	44.3	3.3	30	10	13	7.24	5.88	0.68	19	5.55	8	1.68	24	26	0.91	8	20.5	<5	28	5.52	118.6		7	4.5	4	52.3	1	1.11	14.4	0.8	0.86	5.13	30
07KW8	4.25448e+06	540012	SG	70.6462	12.662	5.79841	0.0703447	0.512511	6.10994	3.58758	9.69752	0.462265	0.0602954	0.0904432	0.3	361	112	<0.5	<10	0.7	<5	19.1	13.1	3.17	38	18.4	23	3.99	50.1	70	1.65	50	66	5	11	15.6	121	0.3	<5	16.2	11	14.6	3	3.15	10.8	<0.5	1.66	3.64	<5
07KW7	4.25479e+06	540191	SG	73.5309	10.563	6.25577	0.0820429	0.276895	4.78925	4.05087	8.84012	0.338427	0.0205107	0.0922982	1.28	141	137	0.6	<10	0.8	6	27.6	20.5	3.13	39	20.9	28	5.79	48.3	70	3.08	64	80.1	9	24	19	127	1	<5	20.9	15	4	3.8	4.21	14.5	<0.5	2.94	5.68	<5
05DSN09	4.25471e+06	540044	SG	73.5688	10.4437	6.05695	0.110675	0.251534	4.94013	4.2459	9.18603	0.321964	0.0100614	0.0503069	0.35	157.9	29.9	<0.5	<10	12.3	<5	12.2	9.69	1.44	34	10.7	26	2.83	25.8	66	1.65	38	34.6	6	6	8.25	125.9		<5	8.7	10	0.9	3.8	1.94	16.7	<0.5	1.45	3.84	<5
07KW1	4.25282e+06	543440	SG	73.7487	13.7896	2.98264	0.11236	0.255363	5.62819	3.01328	8.64147	0.347293	0.081716	0.040858	1.92	526	76	1.3	<10	5.5	7	13.2	10.5	1.74	26	11.1	11	2.88	37.2	30	1.36	31	41	10	19	10.4	96.9	1	<5	9.7	6	21.1	1.9	1.97	8.4	<0.5	1.35	3.79	8
05DSN06	4.25468e+06	541564	SG	76.5744	13.0866	0.671881	0.110309	0.491376	3.95106	4.94384	8.89491	0.170477	0.0100281	0.0100281	0.45	423.2	48.9	1.3	<10	7.8	12	5.68	3.56	0.46	16	5.51	3	1.15	32.4	68	0.53	6	25.9	<5	25	7.34	189.7		<5	5.1	3	23.2	0.8	1	12.3	0.8	0.49	5.45	8
05DSN08	4.25466e+06	541758	SG	78.1981	12.1902	0.481589	0.0802649	0.401324	3.41126	5.04665	8.45791	0.170563	0.0100331	0.0100331	0.65	428.7	40.4	0.6	<10	10.8	<5	3.97	2.94	0.26	15	3.64	5	0.9	22	<10	0.53	10	16.7	<5	23	4.75	170.5		<5	3.3	6	21.1	0.9	0.67	15.1	1.3	0.46	6.63	8
MRM 46-03	4.25914e+06	530746	SG?	53.2012	18.1046	8.13189	4.78406	10.0941	3.63103	0.515829	4.14686	1.24406	0.171943	0.121371	0.8	124	16.7	24.4	90	1.1	36	4.24	2.62	1.25	15	4	2	0.9	8.1	<10	0.35	5	12.6	46	<5	2.77	11.8	0.1	22	3.3	1	267		0.68	1.6	<0.5	0.37	0.64	168
07KW9	4.24996e+06	539737	SG?	56.0642	16.7678	9.66979	3.06553	7.44779	3.85763	1.08014	4.93776	1.75908	0.174879	0.113157	3	238	27.6	19.2	30	3.8	36	6.83	4.74	1.51	21	6.63	5	1.4	15.1	10	0.56	10	19.9	11	7	4.54	34.9	0.3	26	5.2	3	182	0.6	1.1	3.6	<0.5	0.58	1.25	179
NP621	4.2588e+06	531198	SG?	56.2525	19.6277	4.28976	3.45002	10.5221	3.82436	0.485633	4.31	1.31526	0.161878	0.0708215	0.73	153	24.9	13.9	90	1	57	5.57	3.36	1.53	19	5.77	3	1.16	10.3	<10	0.45	6	17.5	19	<5	3.84	13.2		32	4.6	<1	349		0.95	1.6	<0.5	0.45	0.64	202
07KW10	4.25036e+06	539187	SG?	56.6345	15.6584	9.73055	3.60956	6.99542	4.21962	1.25064	5.47026	1.61668	0.152517	0.132181	0.91	204	30.9	27.2	20	1.5	71	6.5	4.88	1.65	20	6.22	4	1.38	14.5	10	0.59	9	20.2	14	7	4.58	33.5	0.2	26	5.3	3	167	0.6	1.07	3.6	<0.5	0.63	1.3	191
NP210	4.25701e+06	559040	SL	52.5324	17.5142	8.30632	6.81726	10.4741	2.72488	0.29376	3.01864	1.094	0.111426	0.131686	1	81.6	13.8	31.2	138	0.5	42	8.61	6.58	2.01	14	8.42	2	2.09	15.4	<10	0.88	4	18.3	47	<5	3.84	6.9		32	4.9	<1	232.5		1.38	0.8	<0.5	0.89	0.35	182
NP239	4.25755e+06	556515	SL	54.2045	17.0319	7.74641	7.8993	7.97065	2.97625	0.866374	3.84263	1.04984	0.132504	0.122312	1.5	371.8	23.3	29.6	304	1.7	39	4.26	2.55	1.35	14	4.59	3	0.87	13.8	<10	0.4	6	16.9	110	10	3.98	22.2		23	4	<1	279.3		0.75	2.9	<0.5	0.35	1.2	135
NP689a	4.2581e+06	558244	SL	56.3753	17.8081	6.84848	5.00661	8.47665	3.36827	1.0176	4.38588	0.864964	0.122113	0.111937	0.97	302	19.2	23.1	90	2.8	26	3.91	2.45	1.13	17	4.03	3	0.79	11	<10	0.32	5	13.1	31	18	3.03	37		25	3.4	<1	286		0.66	3.6	<0.5	0.35	1.47	133
06Y4	4.25817e+06	559023	SL	58.7936	16.3768	6.61174	4.72994	6.99827	3.13295	1.89197	5.02492	1.05788	0.294985	0.111891	1.34	478	35.4	19.4	150	4.8	26	4.93	3.33	1.14	16	5.11	4	1.07	21.6	10	0.44	11	20.9	47	11	5.11	57.4	0.9	18	4.7	2	303	0.7	0.85	5.8	<0.5	0.47	2.49	120
05DSN30	4.24934e+06	566447	SL	59.1875	21.0031	8.49759	1.97109	4.61016	2.42006	0.722733	3.14279	1.41261	0.120456	0.0547525	7.2	681.5	49.6	29	79	5.9	157	6.73	4.1	1.62	19	6.46	5	1.35	22.7	18	0.64	9	24.5	101	18	6.28	24.9		24	5.7	2	280.1	0.7	1.12	7.6	<0.5	0.59	4.5	92
05DSN22	4.25073e+06	561284	SL	59.9939	16.7975	6.5131	3.40434	6.57425	3.06798	2.25257	5.32056	1.111	0.183468	0.101926	1.65	451.8	33.3	17.6	72	5.2	16	5.27	3.41	1.21	16	5.46	4	1.15	17	14	0.51	10	19.7	8	12	4.78	72		18	4.7	2	273.2	0.6	0.93	6.2	<0.5	0.45	2.62	99
05SL1	4.25087e+06	560185	SL	60.241	17.553	5.81637	3.44828	6.37723	3.199	1.99418	5.19319	1.08018	0.207727	0.083091	1.65	814	38.9	15.7	50	4.1	18	6.08	4.08	1.2	18	6.34	4	1.29	18.7	10	0.53	9	21.4	21	13	5.11	75.6	0.4	17	4.9	2	349		0.93	5.3	<0.5	0.54	2.17	88
06Y5	4.25815e+06	558308	SL	60.6184	17.1446	6.21492	2.64313	5.7761	3.51056	2.17369	5.68425	1.50015	0.326564	0.0918461	1.54	498	47.1	13.7	40	6.3	27	9.73	5.86	1.82	17	8.84	4	2.03	30.9	10	0.77	10	34.7	12	14	8.2	71.1	1.2	17	8.3	2	279	0.7	1.6	6.4	<0.5	0.82	2.88	110
NP298	4.24762e+06	554837	SL	60.6726	16.3263	6.23794	3.84029	6.40049	3.11897	2.02174	5.14071	1.07691	0.20319	0.101595	1.65	578.3	39.1	19.5	229	5.4	25	5.24	3.49	1.23	16	5.64	4	1.11	22	13	0.52	12	22.8	43	22	5.7	65		20	5.1	2	328.6	0.7	0.96	7.3	<0.5	0.45	3.16	123
Y0002	4.2502e+06	564608	SL	60.7673	17.3913	6.20972	3.4578	5.5243	3.10997	2.24041	5.35038	1.03325	0.173913	0.0920716	2.21	503	59.4	14	70	6.4	20	13.5	8.37	2.35	17	11.8	4	2.87	35.7	20	1.15	9	43.5	16	14	10.6	72.5	1	15	10.8	3	244	0.6	2.21	6.5	<0.5	1.13	3.17	91
05DSN53	4246052	555848	SL	60.8607	16.291	6.70082	2.34631	5.59426	3.97541	2.3668	6.34221	1.50615	0.266393	0.0922131	0.75	528	42.8	14.4	20	6.6	27	6	3.72	1.21	17	5.79	5	1.27	22.3	30	0.49	11	24.5	12	18	6.07	77.7	0.8	16	5.6	3	243	0.8	1	7.7	<0.5	0.54	3.28	106
04DSN108	4.25324e+06	559407	SL	60.9162	16.6581	5.93107	3.31322	6.50373	3.25186	2.17814	5.43	0.991921	0.163616	0.0920339	1.3	501.2	36.8	16.2	119	5.6	15	5.04	3.05	1.09	18	4.75	5	1.08	18.8	19	0.47	8	20.5	35	12	5.13	71.7		20	4.6	3	282.4	0.6	0.88	6.9	<0.5	0.46	3.05	102
06Y3	4.25042e+06	558049	SL	60.9881	17.2202	5.94506	3.23903	5.90406	3.18778	1.76302	4.9508	1.29151	0.348503	0.112751	1.75	509	44.5	15.1	60	2.4	27	5.6	3.36	1.25	18	5.57	4	1.17	23.3	40	0.47	11	25.1	20	32	6.14	49.3	1.5	15	5.8	2	336	0.7	0.99	7.4	<0.5	0.48	3.01	84
05DSN31	4.24936e+06	566433	SL	61.135	16.3594	6.17701	3.64679	5.96189	3.23704	2.26388	5.50092	0.962917	0.163901	0.0921942	1.45	541.5	41.3	17.8	107	6.1	13	7.3	4.91	1.33	17	7.73	5	1.57	25.6	20	0.72	10	28.7	29	17	7.02	78.2		18	6.6	2	286.3	0.7	1.29	7.9	<0.5	0.68	3.52	113
06DSN27	4.25988e+06	552402	SL	61.2413	17.8792	5.64118	2.6716	5.97	3.58611	1.72626	5.31237	1.04809	0.184957	0.0513769	2.58	511	37.4	21.2	140	3	36	7.36	4.44	1.57	19	7.87	3	1.45	23.7	<10	0.67	7	28.2	64	13	6.86	63.8		22	6.8	1	287	0.6	1.26	5.9	<0.5	0.6	2.13	112
06DSN42	4.24896e+06	565694	SL	61.5322	16.5975	6.0419	3.39035	5.73829	3.62312	1.91276	5.53588	0.920959	0.161927	0.0809635	1.85	505	34.2	15.8	80	4.2	27	5.69	3.77	1.27	17	6.26	3	1.21	20.4	20	0.51	9	23.7	25	16	5.75	75.8		18	5.4	4	257	1.3	0.98	6.4	<0.5	0.51	2.33	99
05DSN33	4.25298e+06	565684	SL	61.6614	16.95	5.81289	2.71811	5.50748	3.91937	2.09712	6.01649	1.0791	0.193424	0.0610811	0.65	591.7	37.1	15	88	3.3	29	3.79	2.34	1.1	17	4.56	3	0.8	19	16	0.34	10	19.4	30	19	4.92	72.3		17	4.2	1	385.8	0.6	0.73	8.1	<0.5	0.3	2.95	96
06DSN40	4.25025e+06	564416	SL	61.6749	16.3257	6.06671	3.45662	5.67369	3.62794	1.97521	5.60314	0.947294	0.151164	0.100776	1.28	503	42.6	20.3	80	4.9	17	6.19	3.74	1.35	18	6.77	4	1.26	24.4	20	0.46	8	28.1	30	13	6.91	75		19	6.4	1	259	0.6	1.07	7.2	<0.5	0.53	2.8	103
06PV2	4.24924e+06	562084	SL	61.9902	17.0269	5.40375	2.93638	5.58728	3.23206	2.4062	5.63825	1.00938	0.316069	0.0917618	1.67	603	39.7	13.9	70	6.3	15	4.41	2.64	1.1	18	4.29	4	0.91	21.1	10	0.36	10	21.6	15	15	5.39	78.8	0.7	14	4.7	2	318	0.7	0.76	6.7	<0.5	0.37	3.06	82
05DSN32	4.24997e+06	566413	SL	62.0089	16.8186	6.13609	2.83516	5.10328	3.74646	2.19725	5.9437	0.992305	0.09113	0.0708789	0.8	591.3	50.5	16.4	79	4.6	33	8.96	5.02	2.32	17	10.9	3	1.75	49.6	29	0.64	10	53.4	24	16	14	79.6		18	11.1	2	273.3	0.6	1.73	7.4	<0.5	0.67	3.14	97
05NC1	4256117	549696	SL	62.1047	16.8999	6.04458	2.03214	4.7071	3.72214	2.66459	6.38673	1.42043	0.290306	0.114049	2.2	647	46.3	14.4	40	8.2	19	5.83	3.49	1.24	20	5.75	6	1.21	24.7	10	0.48	12	26.8	12	20	6.57	92.3	1.1	15	6	3	240	0.9	1.03	9.1	0.6	0.49	3.87	71
05Y3	4.25085e+06	560963	SL	62.1253	16.5392	6.37792	2.43953	5.61298	3.1011	2.39818	5.49928	1.13707	0.186066	0.0826959	2.2	495	38.1	12.3	30	5.6	21	6.1	4.11	1.23	17	5.9	4	1.33	19.1	10	0.55	8	22.1	11	14	5.31	77.9	0.6	18	5.2	2	255		0.89	5.4	<0.5	0.56	2.43	79
05DSN16	4.25469e+06	556939	SL	62.1998	17.1245	5.77941	1.5873	5.06716	4.04965	2.54375	6.59341	1.3024	0.274725	0.0712251	0.9	752.9	51.5	12	12	6.8	32	6.21	3.82	1.27	19	6.8	6	1.27	24.7	19	0.56	14	27	9	26	6.65	85.4		15	6.1	2	336.6	0.8	1.1	9.4	0.7	0.52	4.1	59
05Y4	4.25179e+06	555088	SL	62.3395	16.5349	5.00154	3.35832	5.63829	3.26589	2.48537	5.75126	1.08863	0.215672	0.0718907	1.45	663	43.5	14.3	130	4.6	24	5.62	3.73	1.06	18	5.79	5	1.19	20.9	<10	0.49	10	21.3	21	13	5.5	80.6	0.5	16	4.9	2	255	0.5	0.86	5.9	<0.5	0.5	2.32	93
NP297	4.24705e+06	555060	SL	62.8086	18.6111	3.8103	0.962819	5.33647	4.40438	2.52996	6.93434	1.23937	0.276554	0.0204855	1.1	649.6	45	8.6	20	3.9	26	4.7	2.76	1.41	18	5.87	3	0.96	25.3	28	0.37	12	26	7	24	6.65	79		15	5.7	2	362	0.7	0.92	7	<0.5	0.35	2.12	46
04DSN121	4.24767e+06	567247	SL	63.2986	16.6973	5.35823	1.67381	4.91937	3.76607	2.8169	6.58297	1.1635	0.224536	0.0816493	1.4	651.6	43	9.7	22	6.4	15	5.56	3.45	1.07	18	5.51	6	1.17	21.2	21	0.51	10	24.3	16	21	6.08	87.8		15	5.4	2	245.1	0.8	1.01	8.2	0.6	0.52	3.51	58
05Y7	4.25179e+06	554905	SL	63.3066	16.1569	5.01982	3.44477	4.88771	3.66833	2.42861	6.09694	0.84341	0.172747	0.071131	0.75	620	44.8	15.6	160	4	21	6.24	3.81	1.49	17	7.07	4	1.25	24.6	30	0.48	8	29.7	87	13	7.37	81.5	0.5	14	6.8	2	249		1	6.2	<0.5	0.49	2.66	93
05Y6	4.25262e+06	559352	SL	63.4824	16.4284	5.20231	3.03215	4.67498	3.61018	2.41355	6.02373	0.902545	0.192678	0.0608458	1.1	618	53.6	13	130	4	19	7.08	4.46	1.33	17	7.7	4	1.51	27.6	20	0.62	8	30.8	51	16	7.64	80.5	0.6	14	6.7	2	228		1.09	6.3	<0.5	0.57	2.65	89
06SCS1	4.25325e+06	560953	SL	63.615	17.7388	4.19003	2.47732	4.50607	3.42543	2.94627	6.3717	0.723825	0.305842	0.071363	2.31	632	37	10.2	40	9.6	12	3.32	1.98	0.94	17	3.5	4	0.65	21	10	0.25	7	18.4	23	29	4.83	87.2	1	10	3.8	2	517	0.5	0.57	9	0.7	0.26	4.7	59
04DSN49	4.24742e+06	566277	SL	64.186	16.6174	5.29106	1.22337	4.50607	3.82302	2.91569	6.73871	1.13161	0.234479	0.071363	1.8	634.5	45.5	8.2	14	7.3	33	6.72	4.47	1.12	18	6.42	6	1.51	23.5	26	0.68	11	26.3	8	17	6.59	94.6		14	6	2	228.3	0.8	1.23	8.7	0.6	0.66	3.74	46
04DSN121	4.24767e+06	567247	SL	64.3838	16.9161	4.33668	1.31228	4.91081	4.27517	2.46053	6.7357	1.13799	0.225548	0.0410088	0.8	554	44.9	8.8	30	3.7	21	5.51	3.1	1.17	17	5.56	4	1.06	23.6	20	0.42	10	25.7	7	14	6.4	77.9	1	14	6	2	238	0.7	0.97	6.9	<0.5	0.47	2.52	61
05DSN54	4.24868e+06	561753	SL	64.3892	16.8737	4.71014	2.56729	4.54451	3.19876	2.63975	5.83851	0.828157	0.186335	0.0621118	2.51	653	39.3	10.1	130	5.6	5	4.16	2.54	0.97	17	4.97	4	0.82	21.9	20	0.35	6	22.7	20	16	5.72	83.6		14	4.8	1	352		0.78	7.6	<0.5	0.32	3.11	12
05DSN20	4.24843e+06	562850	SL	64.7608	17.2641	3.7778	2.1631	4.74256	4.10277	2.29512	6.39789	0.700721	0.152331	0.0406215	0.6	696.1	63.1	8.5	49	5.4	13	4.99	2.81	1.59	17	6.84	2	1.03	45.3	20	0.38	8	40.7	26	27	11.1	102.2		11	7.3	2	500.4	0.9	1.07	13.1	0.8	0.39	3.1	53
05SL2	4.25088e+06	560159	SL	64.9258	16.0778	4.48541	2.76498	4.19867	3.69688	2.81618	6.51306	0.77829	0.194572	0.0614439	1.35	699	44.8	11	60	6.2	19	3.95	2.45	0.94	18	4.64	4	0.83	23.1	10	0.35	8	21.6	31	19	5.64	89.4	0.7	11	4.5	2	379		0.63	7.7	0.5	0.34	3.37	64
05DSN28	4.25088e+06	560300	SL	65.2758	16.2087	4.21366	2.58356	4.17265	3.62928	2.88087	6.51015	0.779168	0.194792	0.0615132	1.6	804.3	47.6	11	63	6.8	12	4.44	2.79	1.07	17	5.24	4	0.96	24.6	12	0.42	6	24.7	28	22	6.29	92.9		11	5	1	449.8	0.5	0.85	9.6	0.6	0.38	4.06	62
04SL01	4.25206e+06	558172	SL	65.6143	16.8163	6.03528	0.980088	2.62045	4.77664	1.97049	6.74713	0.825338	0.268235	0.0928505	2.44	687	48.9	7.7	<10	1.2	26	5.65	3.65	1.3	21	6.2	4	1.2	23.6	30	0.53	13	24.3	<5	13	6.2	54.9	1.6	12	5.6	6	218	0.6	0.91	6.1	<0.5	0.49	2.66	22
05Y6	4.2518e+06	554783	SL	65.6323	16.5357	4.37889	2.00061	3.9706	3.52149	2.74574	6.26722	0.826784	0.306216	0.0816577	1.57	722	44.1	9.6	40	5.6	12	4.48	2.8	1.04	18	4.87	4	0.96	24.3	<10	0.47	8	23.4	18	17	6.01	106	0.4	10	5.2	2	313	0.6	0.82	8.4	0.6	0.4	3.62	49
06PV1	4.24924e+06	562084	SL	66.4002	16.3951	3.85285	1.84445	3.99631	3.39174	2.92038	6.31212	0.789015	0.338149	0.0717287	2.51	717	44.6	9.1	40	7.3	12	4.33	2.48	0.97	17	4.46	4	0.87	24.3	10	0.35	9	23.1	18	18	6.04	88.6	0.8	9	4.9	2	327	0.7	0.76	8.4	0.6	0.38	3.67	48
04SL02	4.25206e+06	558172	SL	67.277	15.6363	4.9069	0.915544	2.74663	4.76289	2.72606	7.48894	0.709804	0.236601	0.0822961	1.68	769	54.8	6.1	<10	1.7	19	6.31	4.37	0.94	20	6.62	5	1.4	26.7	20	0.6	9	27.2	<5	18	6.94	78	2	11	6.2	4	200		1.02	7	0.6	0.61	3.01	25
05Y2	4.24712e+06	562712	SL	67.6212	15.9908	3.88796	0.585284	3.28177	3.86706	3.53261	7.39967	0.97199	0.219482	0.041806	2.4	1210	93.8	5.5	<10	9.2	23	16.9	10.9	1.85	19	16.1	7	3.58	42.1	<10	1.48	13	52.6	<5	22	12.4	116	1.6	13	12.8	4	182	0.7	2.52	9.8	0.7	1.52	4.39	31
05DSN55	4.24674e+06	564023	SL	67.67	23.289	3.42744	0.0329562	0.186752	1.88949	2.83423	4.72372	0.604196	0.0549269	0.0109854	7.66	354	10.4	0.5	<10	4.4	17	2.21	1.56	0.23	20	1.75	5	0.46	6.1	20	0.24	7	6.1	<5	30	1.52	113		8	1.5	3	20.7	0.6	0.32	10.6	0.5	0.22	3.68	39
04DSNSLG	4.25011e+06	559091	SL	67.675	15.4694	4.24929	0.839741	2.90368	4.84622	3.1465	7.99271	0.657628	0.141643	0.0708215	1.2	858.9	49.2	5.8	31	2.3	12	6.05	3.59	0.89	19	6.07	5	1.28	25.4	23	0.54	7	26.3	<5	15	6.72	108.5		11	6.1	2	182.2	0.7	1.11	8.3	0.7	0.54	3.87	24
05DSN21	4.25282e+06	561272	SL	67.7156	15.6329	4.67978	1.16994	2.56178	4.37721	3.1064	7.48361	0.605144	0.100857	0.0504286	1.1	790.6	36.4	7.5	64	5.7	16	3.8	2.34	0.84	17	3.94	4	0.78	20.3	34	0.38	9	17.5	33	32	4.78	107.6		11	3.7	3	219	0.7	0.66	9.2	0.6	0.33	3.62	39
05SL10	4.25044e+06	560005	SL	67.9152	15.4353	4.79523	0.987858	2.03746	5.25828	2.67545	7.93373	0.679152	0.154353	0.0617411	1.35	574	62.3	6	<10	1.5	5	7.06	4.45	0.96	20	7.24	4	1.44	29.4	20	0.55	10	30	<5	17	7.75	80.7	3.1	10	6.8	7	164		1.08	7.9	0.6	0.6	3.31	20
04DSN107	4.25292e+06	560339	SL	68.7149	15.2802	4.20537	0.62264	2.61305	4.58304	3.23569	7.81872	0.581811	0.112279	0.051036	0.65	1030.5	56.7	4.7	20	13.3	13	6.66	3.78	1.15	20	6.53	5	1.41	29.2	48	0.61	9	28.4	11	22	7.42	127.5		11	6.7	2	193.1	0.8	1.19	10.7	0.7	0.58	3.74	28
04DSN109	4.25324e+06	559407	SL	68.8426	15.3352	4.13429	0.777122	2.51787	4.11356	3.54367	7.65724	0.559527	0.113978	0.0621697	2.45	791	52.9	5.1	17	9.8	20	6.37	3.87	1.01	20	6.14	9	1.39	26.6	61	0.63	10	26.2	7	25	6.97	118.6		11	5.8	4	194.9	0.9	1.09	12.3	0.8	0.62	5.4	31
05DSN27	4.25161e+06	555238	SL	69.9054	17.2815	3.024	0.155877	1.66268	3.6579	3.36693	7.02484	0.924868	0.0103918	0.0103918	2.7	781	42.7	3.2	<10	7.1	18	5.32	3.48	1.09	21	5.92	4	1.14	27.9	36	0.57	11	27.5	<5	26	7.16	124.1		13	6	2	121.4	0.8	0.98	10.8	0.6	0.5	3.66	33
05DSN14	4.24792e+06	566948	SL	70.7993	15.4742	2.26901	0.286182	2.23835	4.81398	3.61815	8.43213	0.39861	0.0613246	0.0408831	2.1	955.2	52.5	2.2	<10	9.7	16	6.4	4.35	0.98	19	6.65	7	1.4	26.8	42	0.64	12	26.9	<5	25	6.84	112.7		9	6.2	3	169.7	0.7	1.14	11.4	0.8	0.62	5.18	16
05DSN19	4.24756e+06	562266	SL	72.7961	15.6192	1.47272	0.0933416	1.61792	4.24186	3.77515	8.01701	0.362995	0.0103713	0.0103713	3.1	917.9	57.3	0.7	<10	10.1	5	7.05	4.55	1.16	19	7.22	6	1.52	28.8	40	0.72	11	30.2	<5	31	7.88	118.9		10	6.9	3	125.8	0.7	1.28	11.9	0.9	0.66	5.67	10
03DSN13	4.25431e+06	557726	SL	74.6309	15.7517	1.51799	0.0831774	0.831774	2.86962	3.79497	6.66459	0.457475	0.062383	0.0103972	3.4	823.6	34.9	1.7	16	7.1	14	3.64	2.5	0.35	20	3.32	8	0.83	18.3	21	0.45	9	15.9	<5	24	4.34	139.7		9	3.6	4	55.5	0.8	0.63	13.8	0.8	0.41	5.29	23
04DSN105	4.25324e+06	559493	SL	74.8479	14.3343	1.19625	0.0206249	0.845623	4.35186	4.12499	8.47685	0.278437	0.0103125	0.0103125	0.75	857.1	32.9	0.8	<10	6.6	11	4.26	2.52	0.56	20	4.13	7	0.91	23.8	64	0.42	9	21	<5	28	5.91	150.4		6	4.7	3	57.4	0.8	0.76	17.1	0.8	0.4	5.51	8
DW107-04	4249976	552841	SL	75.4698	12.835	2.60807	0.195092	1.30404	3.92237	3.23442	7.15679	0.400452	0.020536	0.010268	2.05	574	56.1	12.8	2	7.51	16.2				15.8				25.5	20		13.9		19.1	16.9		122	4.12	12.1		5.2	105			8.5	0.9		4.8	69
07SN15	4243925	546884	SON	49.96	15.92	7.99	13.65	9.6	1.5	0.57	2.07	0.853	0.137
NUN04	4.24946e+06	542379	SON	51.4274	15.489	12.8569	3.64446	7.87609	4.10002	0.789634	4.88965	2.93582	0.647904	0.232841	0.75	250	33.2	32.1	<10	1.5	29	7.36	4.2	2.37	17	7.22	3	1.47	15.3	<10	0.52	9	24.8	<5	6	5.33	18.6	0.2	27	6.6	2	257	0.7	1.24	2.9	<0.5	0.55	1.04	260
NP510	4.24551e+06	548290	SON	53.3638	17.514	7.90462	5.81431	10.2486	3.03399	0.882801	3.91679	0.994419	0.14206	0.101471	1.5	185.3	34.6	29.2	324	2.7	47	10.1	6.36	1.88	16	9.94	4	2.07	29	11	0.92	12	34.9	218	12	8.73	36.2		27	8.1	2	333.9	0.8	1.73	4.3	<0.5	0.85	2.15	146
NOR2	4.24339e+06	549054	SON	54.4601	15.2573	11.5943	2.61352	6.8113	4.24823	1.70535	5.95358	2.49243	0.625631	0.191726	1.2	335.4	48.1	23.8	16	3.9	25	8.12	5.3	2.48	20	9.24	5	1.78	21	16	0.81	16	30.5	7	15	6.92	46.3		27	7.8	3	282.8	1.1	1.5	4.9	<0.5	0.69	2.29	244
07SN19	4.24344e+06	549092	SON	56.5235	16.8015	9.43788	1.61792	6.27463	4.22112	1.42087	5.64198	2.96619	0.622278	0.114084	3.15	426	50.1	21.3	10	10.6	30	9.66	7.02	2.93	25	10	6	2.08	23.2	<10	0.78	15	34.2	6	10	7.52	52.6	0.4	25	8.6	3	278	0.9	1.62	4.9	<0.5	0.8	2.18	257
NP204	4.2394e+06	547548	SON	58.3241	16.7588	7.99759	3.0644	6.76178	3.90837	1.54727	5.45564	1.276	0.251181	0.110519	0.6	415.6	32.5	17.4	25	3.2	24	5.11	3.12	1.56	17	5.66	3	1.03	21.2	24	0.43	10	23.4	7	19	5.68	49.8		25	5.3	2	333.8	0.7	0.9	5.4	<0.5	0.41	2.33	156
NP373R	4.2434e+06	549963	SON	58.7777	17.5756	6.29364	2.76232	7.22453	3.87534	1.77072	5.64606	1.33563	0.293433	0.0910655	1.15	451.4	38.6	16	38	4.2	44	5.16	3.11	1.49	17	5.34	4	1.05	19.4	15	0.49	20	21.7	14	13	5.23	50.1		26	5.1	2	382.1	1.1	0.9	6	<0.5	0.43	2.65	182
NP202	4.24151e+06	547160	SON	61.7647	19.2428	6.82103	0.531915	2.63872	5.12098	2.09637	7.21736	1.46016	0.271172	0.0521485	3.05	473.1	32.3	10.4	<10	1.8	21	16.5	9.65	5.35	22	18.9	3	3.21	43.9	22	1.3	8	72	7	28	16.6	58.2		17	17.9	3	215.8	3.2	3.12	3.8	<0.5	1.28	1.86	96
NP200R	4.24154e+06	548226	SON	62.5834	16.697	6.63028	0.980392	3.86093	5.79139	1.94057	7.73196	1.19264	0.252678	0.0707499	1.05	474.1	42.2	8.5	<10	2.1	16	8.72	6.23	2.09	19	8.9	3	2	29	25	0.82	10	30.6	<5	17	7.51	54.6		15	7	3	248.8	0.7	1.52	4	<0.5	0.83	2	96
04DSN31	4.24863e+06	544758	SON	65.38	17.688	3.38619	1.67775	4.18414	4.28645	2.32225	6.6087	0.838875	0.184143	0.0511509	1.4	665	62.9	10.8	67	3.9	24	8.17	4.8	2.36	19	9.13	4	1.77	30.1	10	0.71	9	38.2	34	20	9.28	76.9		14	8.9	5	287	0.7	1.57	6.9	<0.5	0.7	3.55	83
04DSN38	4.24492e+06	545902	SON	65.8395	18.5305	5.77935	0.708991	2.94339	2.75003	2.19143	4.94145	1.07423	0.118165	0.0644537	6.2	503.8	49.2	6.5	17	6.3	41	6.8	3.87	1.44	20	6.53	7	1.4	28.5	26	0.6	12	30.4	<5	17	7.65	70.7		14	6.6	4	191.7	1	1.17	9.5	0.5	0.61	4.19	49
04DSN18	4.24091e+06	547914	SON	69.2084	19.2192	4.10915	0.463762	0.916739	1.95211	3.62381	5.57593	0.485332	0.0107852	0.0215703	7.15	441.5	49.5	6.1	126	19.9	14	5.55	3.49	0.69	22	5.23	6	1.19	30.7	21	0.62	10	26	29	26	7.4	142.9		8	5.5	6	63.7	1.2	0.95	17.5	0.9	0.57	6.25	25
04DSN87	4.24675e+06	547227	SON	71.2901	14.9202	3.5635	0.121139	0.747022	5.47143	3.50293	8.97436	0.312942	0.0302847	0.0403796	1.05	771.5	65	1.8	<10	4.6	10	7.96	4.87	1.37	23	7.34	9	1.69	32.6	20	0.78	16	33.8	<5	20	9.13	116.3		6	7.8	5	66.5	1.4	1.44	11.5	0.7	0.75	5.1	7
NP377	4.24185e+06	549457	SON	71.334	14.9121	2.74043	0.382627	1.91313	3.57808	4.58118	8.15926	0.434333	0.0827301	0.041365	3.4	719.1	54.8	4.1	<10	10.1	9	6.08	4.27	0.87	17	6.38	8	1.33	28	15	0.7	10	27.1	<5	25	7.16	121.1		8	5.8	5	120.9	0.9	1.08	12.8	0.9	0.58	5.98	26
07SN16	4.24465e+06	548185	SON	71.6294	15.0963	2.84227	0.0728787	0.739198	5.32015	3.93545	9.2556	0.281104	0.0312337	0.0520562	3.37	427	63.8	0.5	<10	11.2	<5	20.6	15.1	2	23	19.4	9	4.36	66.3	60	1.98	21	77.6	24	23	18.9	112	0.7	<5	18.1	6	48.2	1.4	3.36	9.3	0.7	1.99	5.35	<5
NP057R	4.24204e+06	552865	SON	71.7678	16.3791	2.02963	0.101482	1.16704	4.4449	3.64319	8.08809	0.436371	0.0202963	0.0101482	1.65	772.4	29.5	2.3	<10	2.8	9	3.23	2.32	0.73	19	3.3	7	0.73	18.6	66	0.39	11	15.6	7	23	4.33	125.5		7	3.6	5	96.9	0.9	0.62	12.4	0.8	0.31	5	26
07SN14	4.24675e+06	547318	SON	71.7949	15.0769	2.81026	0.184615	0.748718	5.55897	3.45641	9.01538	0.328205	0.0205128	0.0205128	1.84	616	58.8	1.2	<10	4.2	5	6.39	4.46	1.25	24	6.65	9	1.25	30.7	10	0.5	22	30.4	7	18	7.87	117	0.8	<5	6.6	6	58.8	1.2	1.09	9.3	0.5	0.53	4.38	<5
04DSN86	4.2455e+06	548296	SON	72.4213	15.6944	3.04595	0.0103252	0.154879	4.94579	3.45896	8.40475	0.247806	0.0103252	0.0309757	1.9	418.2	24	<0.5	11	3.3	11	5.7	4.25	0.56	27	4.06	12	1.36	21	54	0.71	19	16	<5	22	4.4	116.1		<5	3.4	7	19.7	1.7	0.87	14.1	0.6	0.69	4.38	7
07SN12	4.24591e+06	548132	SON	72.7046	14.7486	2.45118	0.0623182	0.48816	5.46323	3.8118	9.27503	0.207727	0.0103864	0.0519319	3.03	422	62.8	<0.5	<10	12.4	<5	9.47	6.98	0.82	24	8.44	10	2.07	35.7	70	0.92	21	33.7	<5	23	8.78	122	0.8	<5	7.8	7	20.8	1.4	1.46	9.9	0.6	0.93	5.81	<5
07SN13	4.24588e+06	548203	SON	72.7774	14.8004	2.75595	0.0408288	0.163315	5.73645	3.42962	9.16607	0.234766	0.0408288	0.0204144	1.3	421	35.6	<0.5	<10	4.3	6	6.56	4.86	0.68	24	6	9	1.33	23.9	50	0.65	18	23.4	5	28	6.12	116	0.6	<5	5	7	20.8	1.2	1.04	9.1	0.5	0.65	3.61	<5
04DSN85	4.24528e+06	549283	SON	73.2379	13.913	3.40665	0.0102302	0.102302	5.00256	4.08184	9.0844	0.225064	0.0102302	0.0306905	1.25	316.8	50.4	<0.5	<10	3.7	12	7.08	5.09	0.53	28	5.3	14	1.67	25.2	56	0.95	23	23.1	<5	20	6.43	142.5		<5	5	8	7.3	1.9	1.14	14.7	0.5	0.86	3.9	6
NUN001	4.24946e+06	542379	SON	73.9945	15.3516	1.31	0.0921093	1.2793	4.37007	3.03961	7.40968	0.511718	0.0409375	0.0102344	2.08	634	55.8	0.7	<10	7	8	6.26	3.42	1.24	19	5.58	4	1.17	32.4	30	0.47	9	28.3	<5	17	7.75	110	1.7	9	6.4	3	111	0.8	0.96	9	<0.5	0.5	3.99	25
07SN17	4.23893e+06	547641	SON	74.2421	14.0235	1.87668	0.319654	1.03114	3.82553	4.41328	8.23881	0.216539	0.0206228	0.0309342	2.66	427	47.9	2.1	10	16.4	5	4.49	3.47	0.33	19	4.06	5	0.94	25.5	50	0.45	11	19	12	30	5.31	178	1.2	<5	4.1	8	38.8	0.9	0.72	13.2	1	0.48	6.63	9
NP373	4.24365e+06	549743	SON	74.6524	13.7373	2.10625	0.134883	0.96493	3.94273	4.23324	8.17597	0.207512	0.0103756	0.0207512	3.65	607.1	48.3	1.5	<10	11.1	7	4.69	3.2	0.42	16	4.64	4	1.03	26.5	34	0.55	6	20.9	5	25	5.89	128.7		<5	4.2	4	61.3	0.8	0.8	12.3	0.9	0.48	6.2	7
04DSN11	4.2391e+06	551135	SON	74.9841	13.7804	2.15417	0.0105597	0.559662	3.34741	4.91024	8.25765	0.221753	0.0105597	0.031679	4.6	638.3	64.3	0.8	<10	10.2	8	8.94	5.91	0.88	21	7.24	11	1.93	32.3	15	0.94	17	31	<5	21	8.14	127.6		<5	7.1	5	22.5	1.4	1.4	12.8	0.8	0.94	5.96	6
04DSN39	4.24632e+06	546514	SON	75.4231	13.4894	2.0979	0.0101348	0.111483	4.40863	4.26675	8.67538	0.182426	0.0101348	0.0202696	0.95	259.6	38.3	<0.5	<10	6.5	14	4.4	3.27	0.26	25	2.92	10	1.04	11.3	85	0.59	20	12.4	<5	44	3.49	148.1		<5	3.2	6	10.9	1.7	0.7	16	<0.5	0.56	7.25	9
NP458rB	4.23935e+06	538227	ST	49.5191	18.1809	7.84735	6.92654	11.7557	2.88521	0.951504	3.83671	1.2789	0.532024	0.122775	1.55	480.7	59.2	32.7	123	0.7	65	3.89	2.26	1.66	15	5.55	3	0.75	32.9	13	0.3	37	27.9	78	12	7.46	19.6		27	5.4	1	611.9	1.9	0.81	5.1	<0.5	0.29	1.55	194
047-13A	4.25013e+06	528492	ST	49.6203	17.8228	7.98987	6.84557	11.7468	3.21013	0.881013	4.09114	1.23544	0.516456	0.131646	0.3	371	59	28.9	100	0.9	66	3.43	1.87	1.54	14	4.53	2	0.69	33.6	<10	0.24	26	28.5	57	<5	7.47	17.3	0.2	23	5.3	1	566	1.3	0.69	4.3	<0.5	0.26	1.21	173
NP458rA	4.23935e+06	538227	ST	49.6305	18.1395	8.02713	6.37716	11.8129	3.0165	1.01225	4.02875	1.28556	0.556737	0.141715	1.2	555.4	57.2	31.1	114	0.6	59	3.66	2.03	1.61	14	5.08	3	0.73	31.5	13	<0.05	22	27	76	6	7.11	19		27	5	<1	608.7	1.4	0.71	4.1	<0.5	0.27	1.14	165
MRM 14-04	4.25004e+06	528597	ST	50.5474	16.167	9.80252	6.47703	11.0509	3.38688	0.562775	3.94966	1.59623	0.245575	0.163716	1.05	115	23.7	33	90	0.6	59	5.12	3.16	1.55	15	4.87	3	1.08	11.2	<10	0.42	12	16	32	<5	3.52	12	<0.1	30	4.3	1	296	0.7	0.85	1.8	<0.5	0.43	0.59	215
NP464	4.23613e+06	539651	ST	51.1288	18.8974	7.88148	5.69442	10.8446	3.17476	0.786132	3.96089	1.23967	0.231808	0.120943	0.9	351.5	25.7	27	95	1	22	3.37	2.02	1.19	15	3.55	2	0.64	13.2	16	0.25	12	14	38	11	3.44	18.5		27	3.1	<1	412.1	0.7	0.57	2.5	<0.5	0.27	0.68	181
MRM 4-04	4255973	529281	ST	52.3902	15.9005	8.95933	7.95026	9.13261	3.28203	0.642136	3.92417	1.40658	0.19366	0.142697	0.4	146	19.8	33.7	320	1.3	23	4.77	2.99	1.22	15	4.36	2	1.04	9.4	<10	0.38	6	14.5	139	6	3.15	17.8	0.2	26	4	1	225		0.8	2.1	<0.5	0.4	0.74	186
07DSN21	4.25618e+06	529904	ST	52.5677	16.7812	9.17913	6.79337	9.1387	3.23494	0.49535	3.73029	1.47594	0.181965	0.151638	1.17	153	21.8	37.3	340	0.5	38	5.38	3.79	1.45	17	4.96	3	1.14	10.1	10	0.51	6	15.9	152	10	3.27	9.8	0.2	27	4.1	2	209		1.06	1.8	<0.5	0.46	0.56	176
MRM28-05	4.23896e+06	533228	ST	53.1263	20.331	6.06866	4.65877	11.3404	3.04454	0.38823	3.43277	0.796894	0.122599	0.122599	0.65	112	12	24.2	100	0.4	44	2.74	1.7	0.85	14	2.34	1	0.6	5.8	<10	0.21	3	8.3	35	5	1.78	6.1	0.4	19	2.1	<1	287		0.44	1.5	<0.5	0.24	0.59	130
NP440rB	4.23194e+06	544328	ST	53.6178	20.6325	5.84382	3.26476	11.135	3.37734	0.532187	3.90953	1.36117	0.173984	0.0614062	2.1	160.6	21.7	22.8	217	2.5	63	4.68	2.74	1.64	15	5.54	3	0.96	14	10	0.33	10	20	58	5	4.67	7.8		32	4.8	1	369.4	0.6	0.88	1.7	<0.5	0.35	0.54	162
NP438B	4.2304e+06	545868	ST	54.0016	19.1956	6.05322	3.75787	11.0299	3.90006	0.385944	4.286	1.46252	0.121877	0.0914077	1.65	184.4	18.7	21.8	217	2.1	34	4.03	2.6	1.27	15	4.22	3	0.89	10.4	<10	0.36	9	13.7	45	9	3.22	14		36	3.6	2	351.4	0.6	0.72	2.3	<0.5	0.34	0.77	189
MRM 58-04	4.23897e+06	534102	ST	56.1083	17.4377	6.534	4.11324	8.55472	4.37994	1.14884	5.52877	1.28218	0.348754	0.0923172	0.75	430	42.3	18.1	111	0.99	22.7				17.5				26.4	17		13.2		46.3	7		31.7		25		2.3	447			5.5	<0.1		1.9	195
MRM 29-04	4.25014e+06	531671	ST	57.2719	18.3722	6.38407	3.58206	8.28287	3.37678	1.29324	4.67002	1.15981	0.174484	0.102638	1.3	427	31.3	20.1	90	2.6	15	5.22	3.19	1.34	17	5	3	1.1	18.8	<10	0.45	7	20.7	11	6	4.91	45.6	0.2	21	4.8	1	327		0.93	3.7	<0.5	0.43	1.31	128
NP421	4.22764e+06	547004	ST	62.518	15.5187	9.69272	0.567127	2.59847	5.95999	1.48484	7.44483	1.49515	0.0721798	0.0928026	1.85	1021.9	16.6	7.3	<10	1.9	13	2.72	2.03	1.77	22	2.6	4	0.66	8.7	11	0.32	9	8.9	<5	15	2.29	30.8		22	2.2	2	167.6	1	0.48	6.2	<0.5	0.33	2.1	75
NP428	4.22909e+06	544711	ST	74.9167	14.228	1.0098	0.0807836	0.929011	5.09946	3.53428	8.63375	0.141371	0.0605877	0.010098	0.65	643.3	36.6	0.5	<10	4.2	<5	4.99	3.91	0.56	20	4.29	3	1.2	19.2	13	0.59	13	17	<5	24	4.65	118		<5	4	5	62.5	0.9	0.84	11.7	0.7	0.59	2.91	<5
047-13B	4.24904e+06	528269	ST	75.4659	13.2091	1.60762	0.215032	1.98648	4.24944	2.72374	6.97317	0.419824	0.102396	0.0204792	0.95	584	42.1	2.1	<10	5.8	<5	5.43	3.2	0.73	16	4.55	4	1.09	22.3	20	0.47	9	21.6	7	14	5.63	84.5	1	6	4.8	4	122	0.7	0.86	7.7	0.6	0.49	2.86	20
07DR2JR	4.27531e+06	542885	WL	51.5215	19.0634	6.89913	7.65561	10.5504	2.68299	0.625359	3.30835	0.786742	0.0938039	0.121037	0.59	193.5	15	37.8	340	1.41	32	2.72	1.79	0.98	16.8	2.84	2.1	0.58	6.1		0.22	3.2	8.9	87	5	2.03	19.8			2.3	1	354	0.2	0.47	1.64	<0.5	0.26	0.72	180
07DR2	4.27531e+06	542885	WL	52.3096	18.4562	6.87264	7.05618	11.0125	2.71235	0.571021	3.28337	0.79535	0.0917712	0.122362	0.81	160	2.7	7.9	270	0.4	67	0.59	0.42	0.2	4	0.59	<1	0.11	1.2	<10	0.05	<1	1.9	89	5	0.36	5.6	<0.1	25	0.5	<1	340		0.08	0.3	<0.5	<0.05	0.16	164
07DSN12	4.27502e+06	542725	WL	54.9229	16.8296	8.36441	4.67601	8.60627	4.1822	0.836441	5.01864	1.2597	0.181397	0.141086	0.63	271	25.6	26.2	50	2.5	42	5.06	2.95	1.42	17	4.99	3	1.02	11.6	<10	0.47	6	15.7	8	<5	3.45	27.2	0.2	26	4.1	2	273		0.82	3.3	<0.5	0.43	1.28	176
07DSN09	4.2748e+06	544595	WL	58.4376	16.3504	7.99354	2.77553	6.79249	4.31974	1.1304	5.45014	1.74606	0.312878	0.1413	0.96	360	25.7	19.5	<10	3.1	19	4.88	3.3	1.34	19	4.87	3	0.99	11.4	<10	0.42	6	16.4	<5	17	3.43	35.1	0.5	23	4.1	2	268		0.79	4.1	<0.5	0.4	1.66	223
07DSN20	4.27703e+06	536578	WL	60.075	16.7549	8.653	2.52425	5.9634	2.81085	1.06922	3.88007	1.76367	0.275573	0.110229	8.69	349	31	18.7	30	4.3	26	5.89	3.78	1.45	18	5.35	4	1.33	13.6	30	0.5	8	18.4	17	11	4.02	40.5	0.5	22	4.5	2	223		0.92	4.4	<0.5	0.45	1.75	161
07DSN19	4.27709e+06	536585	WL	61.0248	16.3405	6.63708	2.49143	6.02179	4.27678	1.73492	6.0117	1.08937	0.282429	0.100867	1.42	419	35.3	15	60	5.2	26	5.87	3.75	1.23	19	5.3	5	1.22	16.1	20	0.49	8	19.7	19	15	4.41	61.4	0.7	18	4.7	3	208		0.93	6.2	<0.5	0.5	2.51	119
05DSN26	4.2677e+06	546074	WL	64.2666	16.1956	4.88962	3.0947	4.68331	3.52796	2.26945	5.7974	0.825253	0.175366	0.0722096	1.6	673	47.6	11.7	110	7.1	15	4.78	2.88	1.06	17	5.36	4	0.95	24.4	10	0.34	9	24.4	30	23	6.18	86	0.6	13	5.2	3	252		0.76	7.5	<0.5	0.4	2.93	68
03DSN22	4.26768e+06	546083	WL	64.82	17.2566	5.11953	1.12855	3.63189	4.48343	2.38022	6.86365	0.94388	0.174413	0.0615574	1	610.6	35.5	7.8	23	5.3	18	5.24	3.15	1.39	20	5.02	6	1.1	22.3	29	0.48	8	23.1	<5	15	6.09	76.4		15	5.3	2	226.3	0.7	0.93	7.3	<0.5	0.49	3.41	83
05DSN15	4.26767e+06	546105	WL	65.1498	17.3637	4.61192	1.03283	3.64045	4.61192	2.43379	7.04571	0.92034	0.194294	0.040904	1	692.7	33.5	6.4	15	4	11	5.46	3.67	1.38	17	5.88	4	1.2	21.6	26	0.55	9	22.9	<5	17	5.93	75.2		16	5.3	2	251	0.6	0.96	7.1	<0.5	0.52	2.82	90
07DSN06	4.2744e+06	541896	WL	65.9442	15.9493	4.92792	1.27799	3.33299	4.1509	3.41478	7.56569	0.746345	0.173806	0.0817912	2.09	633	46.8	8	<10	9.2	8	6.35	3.96	1.08	18	6.58	7	1.31	27	20	0.6	9	26.9	<5	15	6.65	105	1.1	11	6	5	162	0.7	1.09	9	0.9	0.55	3.83	60
07DR4	4.27504e+06	542783	WL	66.0636	15.652	5.22411	1.29078	3.54711	4.14676	3.00844	7.1552	0.802927	0.172782	0.0914727	1.84	651	44.5	8.9	10	7.9	15	5.81	4.28	1.21	19	5.61	6	1.19	21.3	30	0.53	10	23.3	9	25	5.47	97.1	1.2	13	5.1	4	194	0.7	0.96	7.9	0.6	0.51	3.56	69
05CQ12	4.2677e+06	546074	WL	66.102	17.2485	4.60649	0.753976	3.0882	4.42057	2.62342	7.044	0.981202	0.13427	0.0413138	1.6	638	33	6	20	4.7	6	4.52	3.16	1.2	20	4.17	5	0.96	18.4	20	0.42	10	16.8	8	18	4.34	86.9	1	14	4.2	3	180	0.5	0.66	8.1	<0.5	0.42	3.51	87
07DR7	4.27275e+06	543660	WL	66.3473	16.3066	4.34162	0.978394	3.33265	4.63718	2.71097	7.34815	0.743987	0.163066	0.438239	0.8	900	49.5	8.2	<10	8.1	10	6.12	3.74	1.17	19	6.31	7	1.32	24.1	20	0.6	9	25.2	<5	14	6.15	102	1.1	11	5.6	5	177	0.7	1.1	9.3	0.8	0.55	3.87	74
03DSN21	4.26932e+06	548636	WL	68.0234	17.6939	4.22954	0.361318	2.59299	3.41126	2.87991	6.29118	0.754516	0.021254	0.031881	4.2	626.4	38.2	10	12	7.8	14	4.2	2.88	0.99	20	4.16	7	0.97	20.9	13	0.47	9	19.1	<5	22	5.23	87.7		11	4.1	4	155.2	0.7	0.75	10.5	0.6	0.43	4.21	46
07DSN04	4.27481e+06	544475	WL	69.2283	15.8849	4.14296	0.719116	2.57594	2.96233	3.62778	6.5901	0.654717	0.128797	0.0751315	6.44	617	46.4	6	<10	9.4	15	6.17	4.09	0.88	17	5.33	6	1.3	23.5	10	0.58	9	24.2	6	17	6.17	109	1.1	9	5.6	4	129	0.7	1.04	10	0.7	0.56	4.48	38
07DSN11	4.27094e+06	545566	WL	69.2444	16.3971	4.94128	0.720142	2.54819	2.50388	2.9138	5.41768	0.565034	0.0997119	0.0664746	8.86	621	46.6	4.5	210	8.6	13	6.06	3.77	1.11	18	6.06	7	1.28	22.1	10	0.6	9	23.2	<5	13	5.8	99.2	0.7	10	5.2	5	131	0.7	1.01	9.4	0.6	0.56	4.04	42
07DR1	4.27481e+06	544479	WL	69.3442	16.0482	5.16221	0.680375	1.96553	3.19668	2.8403	6.03698	0.604778	0.0712774	0.0863968	7.21	597	51.4	7.9	20	7.7	17	7.65	5.07	1.58	21.2	7.47	7.9	1.6	22.3		0.68	12.2	27.4	15	17	6.7	85.2			6.63	4	133.5	0.8	1.28	8.27	<0.5	0.76	3.53	47
07DSN18	4.27779e+06	536720	WL	69.6646	14.8819	4.69104	1.21859	2.37248	3.27833	3.15971	6.43805	0.582336	0.086272	0.064704	7.29	623	44.7	3.7	<10	11.3	14	6.85	4.98	1.11	19	6.01	7	1.47	22.6	30	0.67	11	23.7	14	45	5.46	104	1	11	5.4	4	119	0.7	1.11	8.5	0.5	0.64	3.97	23
07CQ08	4.27093e+06	545616	WL	69.9423	15.4512	3.01813	0.648949	2.22497	4.23362	3.79069	8.02431	0.545941	0.092707	0.0515039	2.84	697	51.2	4.7	<10	10.5	48	6.53	4.53	0.95	19	5.85	8	1.35	24.5	30	0.63	10	25.4	21	25	6.11	134	1.4	8	5.5	5	129	0.7	1.02	10.6	0.8	0.58	4.92	32
07SH4	4.27356e+06	547541	WL	70.9506	17.2066	2.64472	0.265534	2.17738	2.91025	3.282	6.19225	0.520446	0.0106213	0.031864	6.46	800	57	5	10	11.1	10	6.18	4.15	0.75	19	6.02	5	1.25	33.2	<10	0.53	10	31.1	15	23	7.76	126	1.2	9	6.2	5	132	0.7	1.02	12.2	0.9	0.53	5.11	23
04DSN59	4.27363e+06	538951	WL	72.6931	14.2811	2.48927	0.246781	1.59871	3.28326	5.08584	8.3691	0.257511	0.0214592	0.0429184	5.1	937.9	51.6	1.7	<10	15.4	14	6.61	4.18	0.69	18	6.03	7	1.44	26.4	<10	0.69	8	26.8	<5	21	6.86	263.3		8	6.2	4	88.6	0.8	1.21	11.7	1.1	0.67	5.27	9
03DSN17	4.26347e+06	548698	WL	72.7004	15.327	3.11181	0.200422	1.25527	2.8692	4.15612	7.02531	0.35865	0.0105485	0.021097	4.65	715.1	48.1	2.2	18	10.1	14	5.19	3.44	0.49	19	4.79	7	1.13	24.7	32	0.53	8	22.5	42	23	6.21	127.1		9	4.7	5	65.1	0.8	0.94	13.6	0.9	0.55	5.58	20
07SH3	4.27296e+06	547625	WL	72.8303	15.0068	2.70752	0.325323	1.47969	3.46311	3.76745	7.23056	0.3673	0.0104943	0.0419771	4.59	867	54.9	3.4	<10	16.5	12	6.4	4.61	0.59	20	5.77	7	1.32	28.2	20	0.67	10	25.2	27	25	6.45	137	1.6	9	5.5	5	85.4	0.8	1.02	12.1	1	0.56	4.86	18
07SH2	4.27223e+06	548199	WL	72.8876	15.8205	1.30572	0.151828	1.19438	4.58521	3.67424	8.25944	0.313778	0.0263169	0.0404875	0.95	917	64.6	5.2	20	6.13	11	8.93	5.43	1.07	22	9.62	8.7	1.8	38.8		0.71	11.2	42.9	9	18	11.2	122.5			9.33	4	91.5	0.8	1.59	11.75	0.5	0.81	4.62	27
07DR6	4.27485e+06	542867	WL	73.7924	13.9231	2.63468	0.224912	1.12456	4.1448	3.80208	7.94688	0.267752	0.0321302	0.0535504	6.27	736	55.3	1.5	<10	11.4	14	7.65	4.87	0.81	18	7.06	8	1.6	26.7	<10	0.85	12	27	<5	19	6.72	131	0.9	7	6.3	6	55.2	0.9	1.24	10.8	0.8	0.74	5.01	<5
03DSN19	4.26462e+06	548476	WL	73.8429	14.509	2.78942	0.245223	0.776541	3.37182	4.08706	7.45888	0.337182	0.0102176	0.0408706	1.7	786.9	35.7	2.9	13	6.2	15	4.63	3.3	0.54	19	3.58	8	1.06	20.8	40	0.62	9	16.6	7	38	4.47	140.4		7	3.5	4	51	0.9	0.72	14.7	0.9	0.59	5.88	19
07DR5	4.275e+06	542654	WL	74.0363	14.6849	1.50928	0.0509892	0.632266	5.31307	3.47746	8.79054	0.275342	0.0101978	0.0101978	0.81	705	46.7	1.1	<10	2.1	9	5.48	3.5	0.67	19	5.27	8	1.15	25.5	40	0.63	13	23.6	<5	14	6.25	132	0.6	7	5	4	37.6	0.9	0.92	12	0.7	0.55	5.15	6
07CQ8	4.27092e+06	545521	WL	74.2196	15.8601	1.91309	0.11314	0.462844	3.32219	3.93932	7.26151	0.143996	0.0154281	0.0102854	2.32	980	36.1	1.2	<10	4.99	9	4.04	2.62	0.37	22	3.52	8.6	0.82	16.4		0.41	11.1	14.7	<5	26	3.83	167			3.35	7	36.4	1	0.61	18.85	0.6	0.43	6.03	7
07SH5	4.27206e+06	548618	WL	74.3774	15.5946	1.17138	0.112045	0.702827	3.92157	3.85027	7.77184	0.244461	0.0152788	0.0101859	1.58	811	41.1	1.4	<10	3.77	7	5.41	3.7	0.69	20.8	5.38	9.2	1.19	26.2		0.52	10.8	23.1	<5	16	6.25	127			4.71	3	48.5	0.9	0.9	12.8	<0.5	0.56	4.42	15
07SH1	4.27263e+06	547811	WL	75.632	14.3281	0.706171	0.112578	0.747109	4.26773	3.91976	8.18749	0.266094	0.0102344	0.0102344	1.31	878	39.1	1	10	5.9	<5	4.08	2.79	0.53	20	3.75	8	0.86	20.5	60	0.49	10	17.2	<5	15	4.56	154	0.8	6	3.5	4	46.2	0.8	0.68	13.7	0.6	0.42	5.42	15
MRM28-01	4.26677e+06	547056	WL?	62.8847	15.2852	8.39146	0.892491	4.16496	4.59581	2.20558	6.8014	1.06689	0.359048	0.153878	0.7	562	50.2	6.6	<10	2.4	16	9.42	6.46	1.71	20	8.77	3	2.06	27.3	10	0.92	11	33.7	<5	14	7.74	72.2	0.6	32	7.7	2	199	0.7	1.53	7.1	<0.5	0.94	2.39	49
07DSN31	4.26253e+06	547606	WL?	66.8325	18.0599	5.40716	0.47583	3.2443	2.85498	2.09798	4.95296	0.95166	0.032443	0.0432573	7.57	649	51.3	10.7	20	7.3	23	4.93	3.41	1.06	21	4.11	5	1.09	18.5	20	0.46	9	18.2	21	16	4.31	75.7	1.4	20	4	3	216	0.6	0.75	7.3	<0.5	0.43	3.79	118
06DSN29	4.26005e+06	551583	WL?	76.9859	14.3966	1.40903	0.030631	0.2961	2.22585	4.40065	6.62651	0.234838	0.0102103	0.0102103	3.05	593	33	1.3	50	10.7	<5	2.36	1.62	0.29	17	2.65	3	0.48	19.8	50	0.22	7	13.8	24	28	3.99	189		<5	2.7	7	29.4	1.2	0.44	12.3	0.8	0.22	5.42	<5
[truncated: 5 more columns]
